# Supplementary material for: Characterization of Genomic, Physiological, and Probiotic Features of Lactiplantibacillus plantarum JS21 Strain Isolated from Traditional Fermented Jiangshui
Source: MDPI journal article supplement (doi:10.3390/foods13071082), 2024-04-01
Supplement: s1 [file s1]

# Characterization of Genomic, Physiological, and Probiotic Features *Lactiplantibacillus plantarum* JS21 Strain Isolated from of Traditional Fermented “Jiangshui”

Yang Liu<sup>1,†</sup>, Shanshan Wang<sup>1,2,\*,†</sup>, Ling Wang<sup>1,3,4</sup>, Hongzhao Lu<sup>1,3,4</sup>, Tao Zhang<sup>1,5,6</sup>, Wenxian Zeng<sup>1,3,4</sup>

1. School of Biological Science and Engineering, Shaanxi University of Technology, Hanzhong 723001, China;

2. QinLing-Bashan Mountains Bioresources Comprehensive Development C. I. C., Hanzhong 723001, China;

3. Engineering Research Center of Quality Improvement and Safety Control of Qinba Special Meat Products, Hanzhong 723001, China;

4. Shaanxi Union Research Center of University and Enterprise for Zhenba Bacon, Hanzhong 723001, China;

5. Qinba State Key Laboratory of Biological Resources and Ecological Environment, Hanzhong 723001, China;

6. Shaanxi Province Key Laboratory of Bio-resources, Hanzhong 723001, China

\* CONTACT: Shanshan WANG, School of Biological Science and Engineering, Shaanxi University of Technology, No. 1 Dongyihuan Road, Hanzhong, Shaanxi 723000, China. Email: wss@snut.edu.cn.

†These authors contributed equally to this work.

## Supplementary data

Figure S1. Location of phage on the JS21 genome.

Figure S2. Annotated map of glycolysis/gluconeogenesis pathways in JS21.

Figure S3. Annotated map of pentose phosphate (phosphoketolase) pathways in JS21.

Figure S4. The graphical presentation of galactose metabolism pathway of *Lactiplantibacillus plantarum* JS21 was obtained from KEGG Mapper.

Figure S5. The ability of CFS to inhibit the growth of pathogenic bacteria.

Figure S6. Growth curve of JS21 versus acid production rate curve.

Table S1. The predicted prophage regions.

Table S2. The first prophage (intact) region elements.

Table S3. The second prophage (intact) region elements.

Table S4. The third prophage (intact) region elements.

Table S5. The fourth prophage (incomplete) region elements.

Table S6. The fifth prophage (incomplete) region elements.

Table S7. Horizontal gene transfer of prophage region proteins using ProteinBLAST.

Table S8. The predicted transposases of the JS21 genome by using IS Finder.

Table S9. Match between antibiotic resistance gene search using KofamKOALA (KEGG Orthology) web servers and phenotypic antibiotic resistance results.

Table S10. Horizontal gene transfer screening for antibiotic resistance genes.

Table S11. Carbohydrate metabolism genes annotated by KEGG orthology.

Table S12. KEGG (BlastKOALA) orthology search results for ABC transporters.

Table S13. Phosphotransferase system (PTS) annotated by KEGG (BlastKOALA).

Table S14. The predicted biosynthetic gene clusters of secondary metabolites.

Table S15. The RiPP-like region elements.

Table S16. The T3PKS region elements.

Table S17. The terpene region elements.

Table S18. The cyclic-lactone-autoinducer region elements.

Table S19. Putative probiotic genes are found in the genome.

Table S20. The hydrophobicity, auto-aggregation, and co-aggregation.

Table S21. Tolerance of JS21 to simulated gastrointestinal fluids.

Table S22. JS21 Inhibition zone results of CFS against pathogens bacteria.

Figure S1. Location of phage on the JS21 genome (green marked regions: intact and the score >90, blue marked regions questionable and score between 70 and 90, the red-coloured regions: incomplete and the score <70)

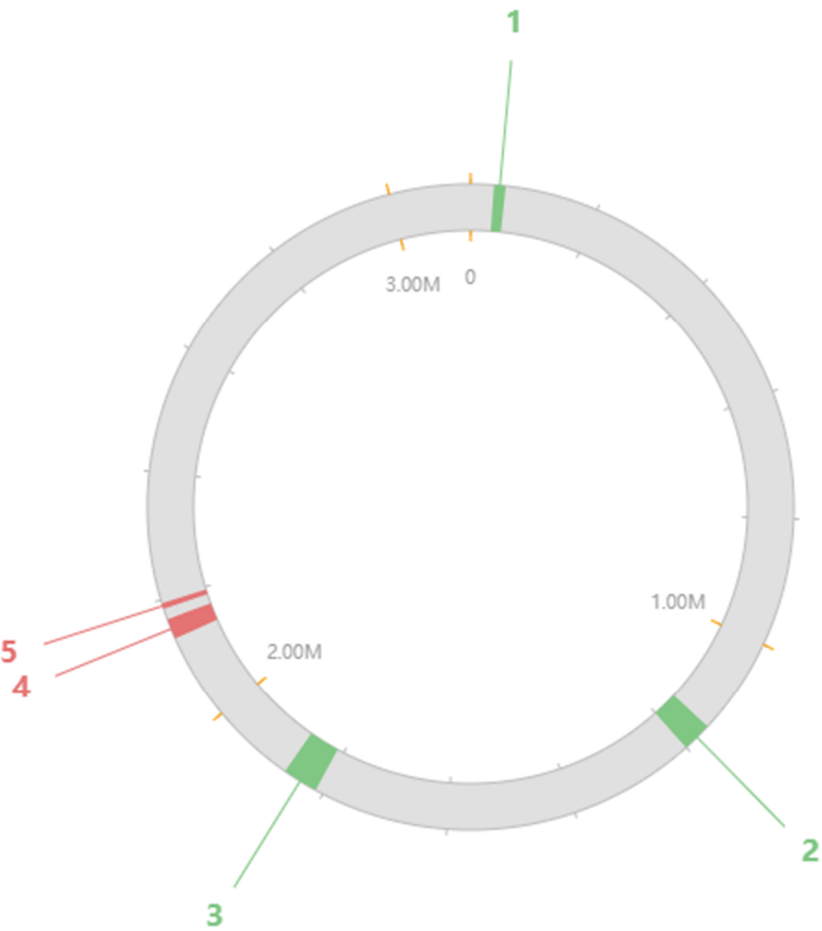

Figure S2. Annotated map of **glycolysis/gluconeogenesis** pathways in JS21 (Green coloured EC numbers indicate the presence of the pathway enzymes)

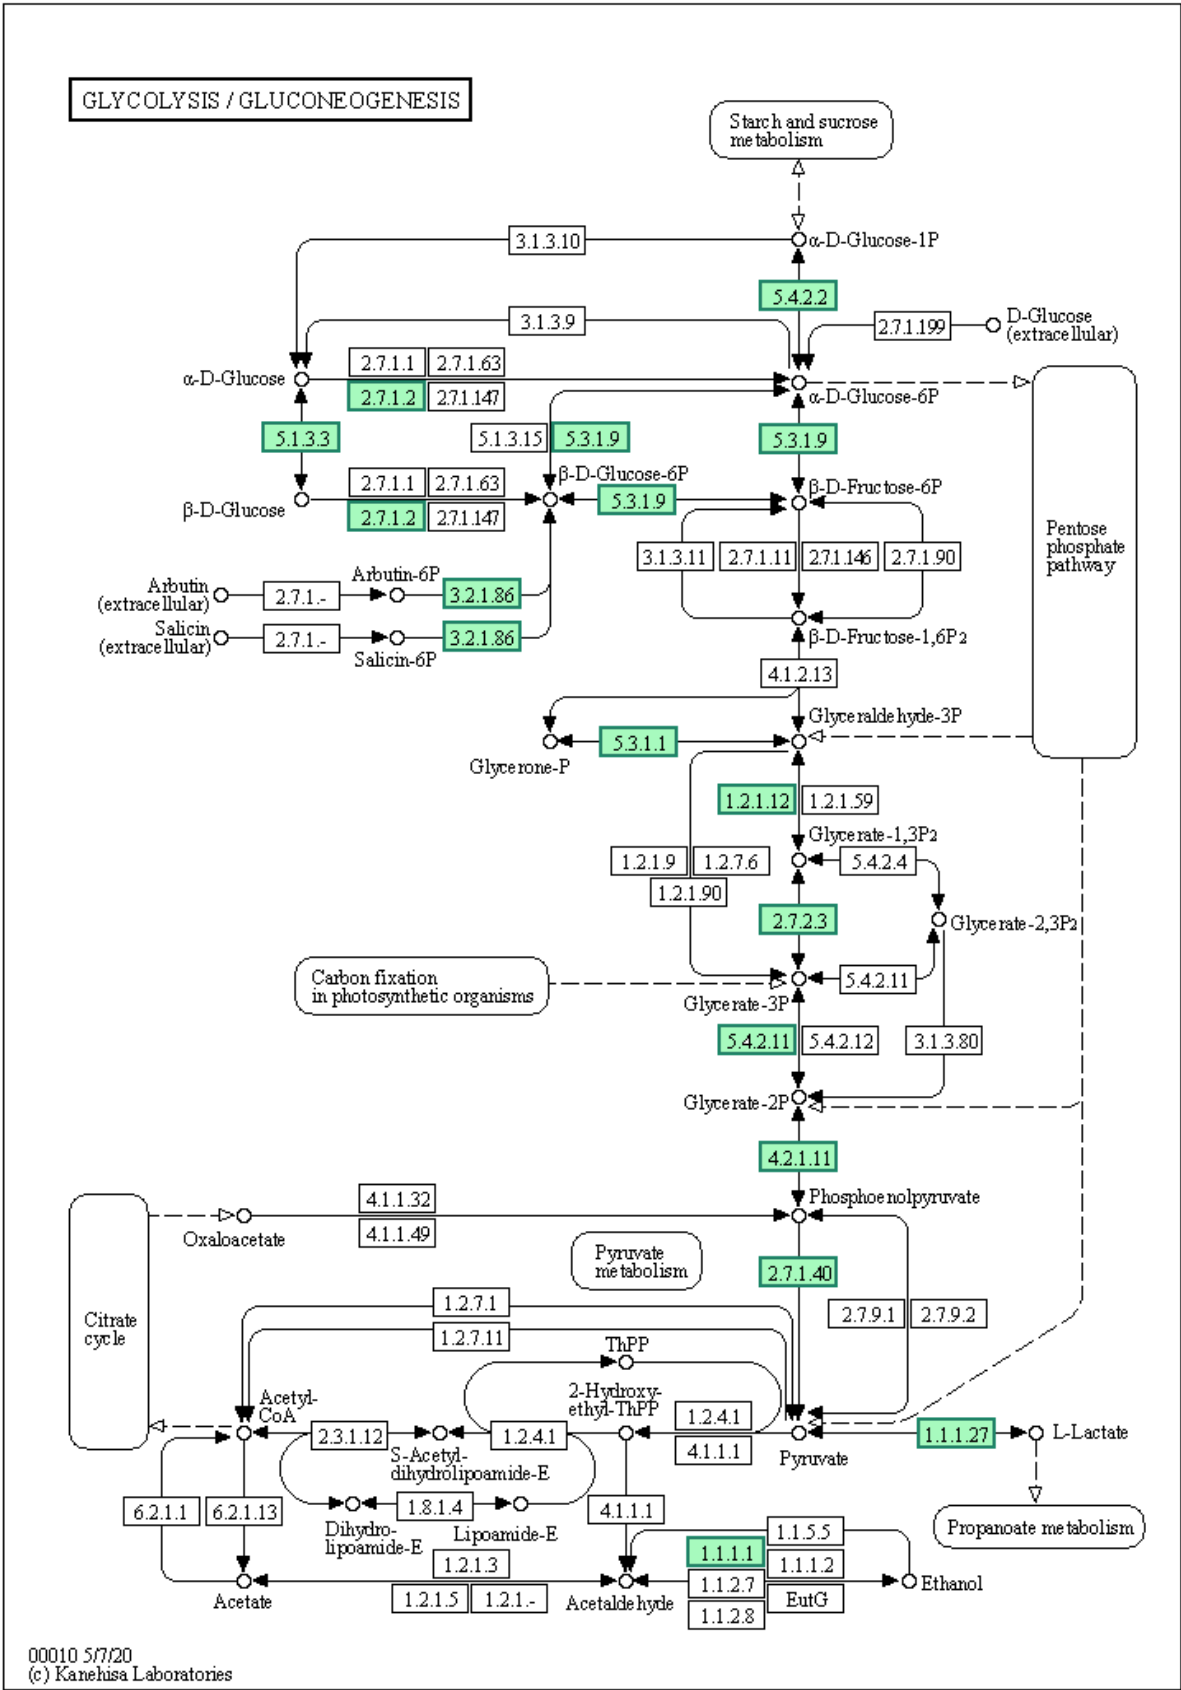

[illegible]



Figure S5. The ability of CFS to inhibit the growth of pathogenic bacteria. a- *Escherichia coli* ATCC 25922, b- *Escherichia coli* K88, c- *Staphylococcus aureus* CMCC 26003, d- *Listeria monocytogenes* CICC 21635.

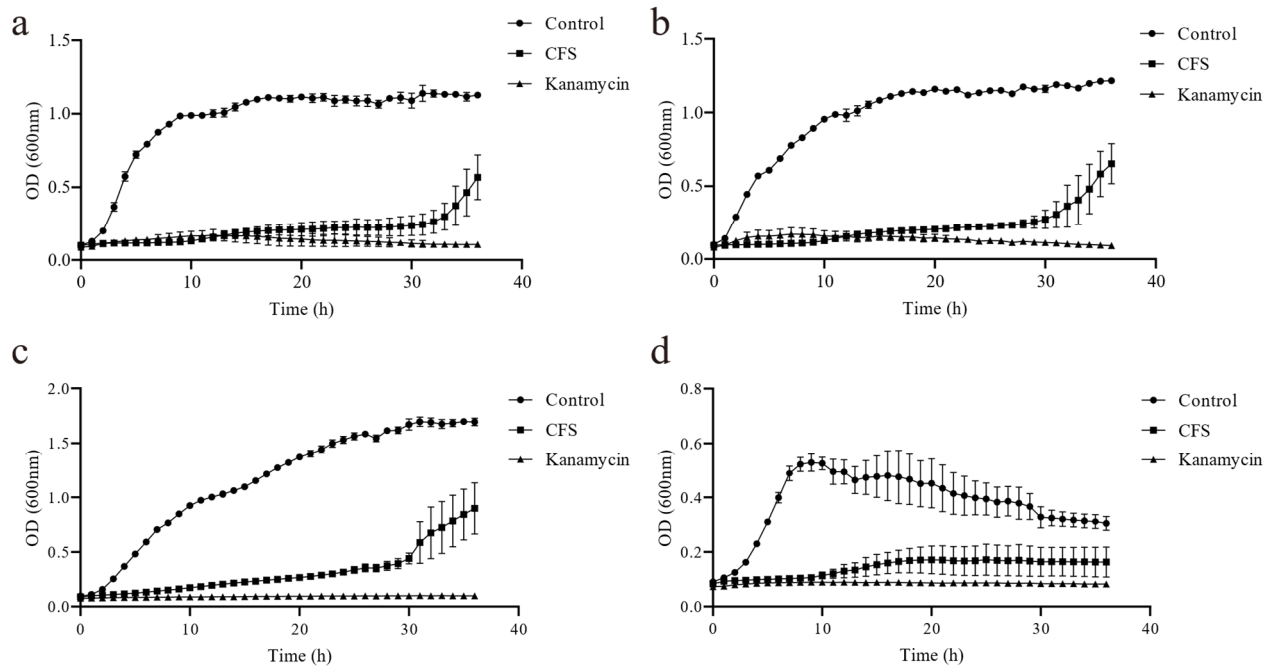

Figure S6. Growth curve(a) of JS21 versus acid production rate curve (b)

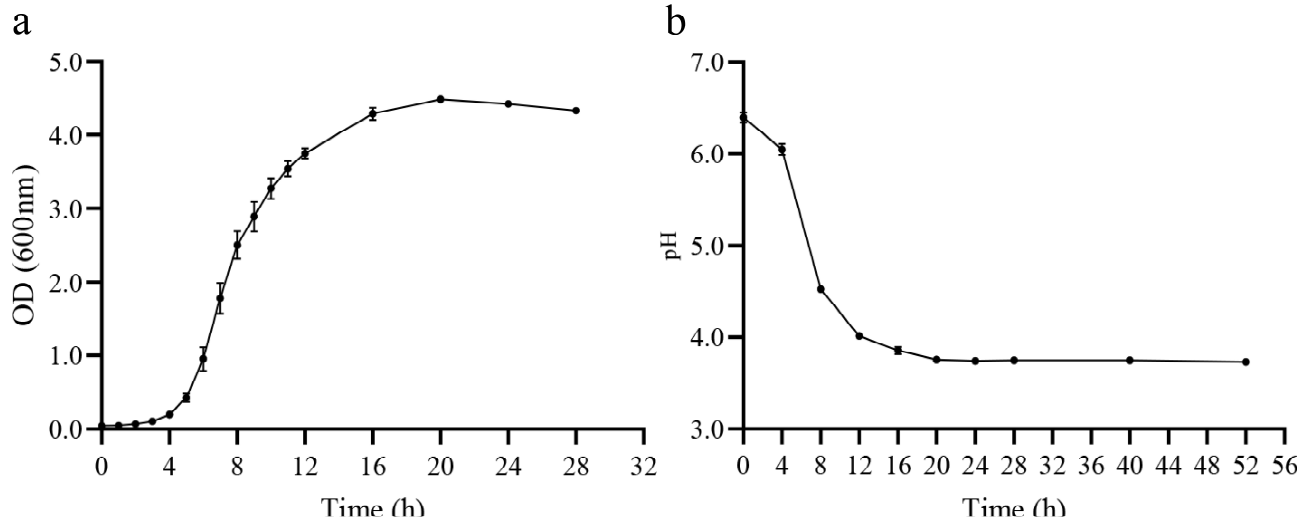

Table S1. The predicted prophage regions of *Lactiplantibacillus plantarum* strain JS21

| Region | Length | Completeness | Score | Total Proteins | Region Position | Most Common Phage<br>(Number of matching proteins) | GC %   |
|--------|--------|--------------|-------|----------------|-----------------|----------------------------------------------------|--------|
| 1      | 18.1Kb | intact       | 100   | 25             | 36132-54235     | PHAGE_Staphy_phiPV83_NC_002486(3)                  | 42.15% |
| 2      | 46Kb   | intact       | 140   | 54             | 1154203-1200222 | PHAGE_Lactob_Sha1_NC_019489(26)                    | 40.70% |
| 3      | 55.4Kb | intact       | 150   | 59             | 1812273-1867677 | PHAGE_Lactob_Sha1_NC_019489(26)                    | 40.65% |
| 4      | 31.6Kb | incomplete   | 60    | 10             | 2137180-2168851 | PHAGE_Paenib_Tripp_NC_028930(3)                    | 43.31% |
| 5      | 9.1Kb  | incomplete   | 20    | 10             | 2186014-2195185 | PHAGE_Strept_APCM01_NC_029030(1)                   | 41.40% |

Table S2. The first prophage (intact) region elements of *Lactiplantibacillus plantarum* JS21 (PHAGE\_Staphy\_phiPV83\_NC\_002486).

| #        | Locus           | ORF Start    | ORF Stop     | Strand          | Homolog/Ortholog Species             | Homolog/Ortholog Protein                                                                          | E-Value         |
|----------|-----------------|--------------|--------------|-----------------|--------------------------------------|---------------------------------------------------------------------------------------------------|-----------------|
| 1        | PP_00028        | 36132        | 36581        | Backward        | Hypothetical protein                 | PP_00028, hypothetical protein, phage(gi100030), PHAGE_Lactob_PLE3_NC_031125                      | 1.31E-17        |
| 2        | PP_00029        | 36779        | 36979        | Forward         | Portal protein                       | PP_00029, portal protein, phage(gi100069), PHAGE_Vibrio_1.026.O._10N.222.49.C7_NC_049430          | 1.99E-08        |
| 3        | PP_00030        | 37071        | 37295        | Forward         | Hypothetical protein                 | PP_00030, hypothetical                                                                            | N/A             |
| 4        | PP_00031        | 37513        | 38511        | Forward         | Transposase                          | PP_00031, putative transposase, phage(gi588498272), PHAGE_Staphy_StauST398_4_NC_023499            | 5.67E-63        |
| 5        | <i>attL</i>     | 38584        | 38602        | Forward         | Attachment site(TATGATGGGCAGTCAGGGG) | <i>attL</i>                                                                                       | N/A             |
| <b>6</b> | <b>PP_00032</b> | <b>38879</b> | <b>40033</b> | <b>Backward</b> | <b>Integrase</b>                     | <b>PP_00032, integrase, phage(gi23097608),PROPHAGE_Oceano_HTE831</b>                              | <b>3.25E-86</b> |
| 7        | PP_00033        | 40086        | 40652        | Backward        | Phage-like protein                   | PP_00033, putative transcriptional regulator, phage(gi446730276), PHAGE_Lactob_phiAQ113_NC_019782 | 4.25E-10        |
| 8        | PP_00034        | 40969        | 41157        | Forward         | Phage-like protein                   | PP_00034, prophage Lp3 protein 4-like protein, phage(gi418489838), PHAGE_Lactob_Sha1_NC_019489    | 3.61E-08        |
| 9        | PP_00035        | 41440        | 41658        | Forward         | Hypothetical protein                 | PP_00035, hypothetical                                                                            | N/A             |
| 10       | PP_00036        | 41655        | 42455        | Forward         | Hypothetical protein                 | PP_00036, hypothetical protein, phage(gi13095885), PHAGE_Lactoc_bIL310_NC_002669                  | 7.03E-23        |
| 11       | PP_00037        | 42455        | 43849        | Forward         | Tail protein                         | PP_00037, minor tail protein, phage(gi100055), PHAGE_Staphy_vB_SpsS_QT1_NC_048192                 | 5.84E-77        |
| 12       | PP_00038        | 43995        | 44474        | Forward         | Hypothetical protein                 | PP_00038, hypothetical                                                                            | N/A             |
| 13       | PP_00039        | 44489        | 44800        | Forward         | Hypothetical protein                 | PP_00039, hypothetical                                                                            | N/A             |
| 14       | PP_00040        | 44787        | 45128        | Forward         | Head protein                         | PP_00040, phage head-tail adaptor, phage(gi418489808), PHAGE_Lactob_Sha1_NC_019489                | 1.47E-14        |
| 15       | PP_00041        | 45238        | 45510        | Forward         | Phage-like protein                   | PP_00041, phage endonuclease, phage(gi119443688), PHAGE_Staphy_Pv1108_NC_008689                   | 1.19E-14        |
| 16       | PP_00042        | 46414        | 46887        | Forward         | Phage-like protein                   | PP_00042, methyltransferase type 11, phage(gi100001), PHAGE_Gordon_Zirinka_NC_031097              | 2.34E-15        |
| 17       | PP_00043        | 46884        | 48587        | Forward         | Hypothetical protein                 | PP_00043, hypothetical protein, phage(gi28876230), PHAGE_Strept_315.2_NC_004585                   | 1.84E-132       |
| 18       | PP_00044        | 48541        | 48741        | Forward         | Hypothetical protein                 | PP_00044, hypothetical                                                                            | N/A             |
| 19       | PP_00045        | 48742        | 49842        | Forward         | Portal protein                       | PP_00045, portal protein, phage(gi225626395), PHAGE_Enterо_EFAP_1_NC_012419                       | 4.20E-49        |
| 20       | PP_00046        | 49839        | 51374        | Forward         | Head protein                         | PP_00046, capsid protein, phage(gi9635171), PHAGE_Staphy_PVL_NC_002321                            | 1.00E-44        |
| 21       | PP_00047        | 51488        | 51757        | Forward         | Head protein                         | PP_00047, head-tail joining protein, phage(gi225626391), PHAGE_Enterо_EFAP_1_NC_012419            | 3.38E-08        |
| 22       | PP_00048        | 51916        | 52284        | Forward         | Hypothetical protein                 | PP_00048, hypothetical                                                                            | N/A             |
| 23       | PP_00049        | 52408        | 52608        | Forward         | Portal protein                       | PP_00049, portal protein, phage(gi100069), PHAGE_Vibrio_1.026.O._10N.222.49.C7_NC_049430          | 7.45E-10        |
| 24       | PP_00050        | 52695        | 52925        | Forward         | Hypothetical protein                 | PP_00050, hypothetical                                                                            | N/A             |
| 25       | PP_00051        | 52931        | 53044        | Forward         | Hypothetical protein                 | PP_00051, hypothetical                                                                            | N/A             |
| 26       | <i>attR</i>     | 53127        | 53145        | Forward         | Attachment site(TATGATGGGCAGTCAGGGG) | <i>attR</i>                                                                                       | N/A             |
| 27       | PP_00052        | 53528        | 54235        | Forward         | Hypothetical protein                 | PP_00052, hypothetical protein, phage(gi100030), PHAGE_Altero_vB_AmeM_PT11_V22_NC_048847          | 3.00E-12        |



Table S3. The second prophage (intact) region elements of *Lactiplantibacillus plantarum* JS21 (PHAGE\_Lactob\_Sha1\_NC\_019489).

| #  | Locus           | ORF Start      | ORF Stop       | Strand          | Homolog/Ortholog Species           | Homolog/Ortholog Protein                                                                        | E-Value   |
|----|-----------------|----------------|----------------|-----------------|------------------------------------|-------------------------------------------------------------------------------------------------|-----------|
| 1  | PP_01075        | 1154203        | 1156470        | Forward         | Phage-like protein                 | PP_01075, ABC transporter, phage(gi371496158), PHAGE_Plankt_PaV_LD_NC_016564                    | 4.26E-05  |
| 2  | <i>attL</i>     | 1156982        | 1156998        | Forward         | Attachment site(AATTATGCCCCAGGCAG) | <i>attL</i>                                                                                     | N/A       |
| 3  | <b>PP_01076</b> | <b>1157115</b> | <b>1158251</b> | <b>Backward</b> | <b>Integrase</b>                   | <b>PP_01076, phage integrase, phage(gi418489824), PHAGE_Lactob_Sha1_NC_019489</b>               | <b>0</b>  |
| 4  | PP_01077        | 1158655        | 1159170        | Forward         | Hypothetical protein               | PP_01077, hypothetical protein, phage(gi100029), PHAGE_Pseudo_MD8_NC_031091                     | 8.82E-07  |
| 5  | PP_01078        | 1159471        | 1159647        | Backward        | Hypothetical protein               | PP_01078, hypothetical                                                                          | N/A       |
| 6  | PP_01079        | 1159959        | 1161233        | Backward        | Hypothetical protein               | PP_01079, hypothetical protein, phage(gi100036), PHAGE_Clostr_phiCDHM14_NC_048665               | 3.63E-28  |
| 7  | PP_01080        | 1161290        | 1161697        | Backward        | Hypothetical protein               | PP_01080, hypothetical protein, phage(gi100028), PHAGE_Lactob_PLE2_NC_031036                    | 8.83E-39  |
| 8  | PP_01081        | 1161690        | 1162022        | Backward        | Hypothetical protein               | PP_01081, hypothetical protein, phage(gi100029), PHAGE_Lactob_PLE2_NC_031036                    | 2.85E-37  |
| 9  | PP_01082        | 1162280        | 1162501        | Forward         | Hypothetical protein               | PP_01082, hypothetical                                                                          | N/A       |
| 10 | PP_01083        | 1162503        | 1163291        | Forward         | Phage-like protein                 | PP_01083, phage-related antirepressor, phage(gi418489833), PHAGE_Lactob_Sha1_NC_019489          | 1.07E-74  |
| 11 | PP_01084        | 1163305        | 1163493        | Forward         | Phage-like protein                 | PP_01084, putative transcriptional regulator, phage(gi100045), PHAGE_Lactob_Lb_NC_047983        | 4.27E-06  |
| 12 | PP_01085        | 1163490        | 1163891        | Backward        | Hypothetical protein               | PP_01085, hypothetical                                                                          | N/A       |
| 13 | PP_01086        | 1164108        | 1164437        | Forward         | Hypothetical protein               | PP_01086, hypothetical protein, phage(gi418489836), PHAGE_Lactob_Sha1_NC_019489                 | 5.81E-72  |
| 14 | PP_01087        | 1164527        | 1164781        | Forward         | Hypothetical protein               | PP_01087, hypothetical                                                                          | N/A       |
| 15 | PP_01088        | 1164951        | 1165121        | Forward         | Hypothetical protein               | PP_01088, hypothetical                                                                          | N/A       |
| 16 | PP_01089        | 1165121        | 1165981        | Forward         | Hypothetical protein               | PP_01089, hypothetical protein, phage(gi971754947), PHAGE_Lactob_iLp1308_NC_028911              | 1.59E-48  |
| 17 | PP_01090        | 1165982        | 1166644        | Forward         | Phage-like protein                 | PP_01090, phage nucleotide-binding protein, phage(gi418489844), PHAGE_Lactob_Sha1_NC_019489     | 9.83E-162 |
| 18 | PP_01091        | 1166646        | 1167305        | Forward         | Hypothetical protein               | PP_01091, hypothetical protein, phage(gi418489845), PHAGE_Lactob_Sha1_NC_019489                 | 1.58E-156 |
| 19 | PP_01092        | 1167352        | 1168044        | Forward         | Hypothetical protein               | PP_01092, hypothetical protein, phage(gi418489846), PHAGE_Lactob_Sha1_NC_019489                 | 2.96E-172 |
| 20 | PP_01093        | 1168150        | 1168266        | Forward         | Hypothetical protein               | PP_01093, hypothetical                                                                          | N/A       |
| 21 | PP_01094        | 1168273        | 1169022        | Backward        | Hypothetical protein               | PP_01094, hypothetical protein, phage(gi418489416), PHAGE_Lactob_LF1_NC_019486                  | 4.38E-42  |
| 22 | PP_01095        | 1169090        | 1169896        | Forward         | Hypothetical protein               | PP_01095, hypothetical protein, phage(gi238821328), PHAGE_Strept_PH10_NC_012756                 | 9.65E-38  |
| 23 | PP_01096        | 1169890        | 1170825        | Forward         | Phage-like protein                 | PP_01096, DNA replication protein, phage(gi971747669), PHAGE_Lactob_iA2_NC_028830               | 6.68E-55  |
| 24 | PP_01097        | 1171121        | 1171429        | Forward         | Hypothetical protein               | PP_01097, hypothetical protein, phage(gi418489790), PHAGE_Lactob_Sha1_NC_019489                 | 1.10E-61  |
| 25 | PP_01098        | 1171422        | 1171538        | Forward         | Hypothetical protein               | PP_01098, hypothetical protein, phage(gi418489791), PHAGE_Lactob_Sha1_NC_019489                 | 9.77E-09  |
| 26 | PP_01099        | 1171773        | 1171886        | Forward         | Phage-like protein                 | PP_01099, LP1-like protein, phage(gi418489797), PHAGE_Lactob_Sha1_NC_019489                     | 3.42E-16  |
| 27 | PP_01100        | 1171867        | 1172292        | Forward         | Phage-like protein                 | PP_01100, phage transcriptional activator RinA, phage(gi418489798), PHAGE_Lactob_Sha1_NC_019489 | 1.10E-77  |
| 28 | PP_01101        | 1172733        | 1172912        | Forward         | Hypothetical protein               | PP_01101, hypothetical                                                                          | N/A       |

|    |             |         |         |          |                                    |                                                                                                                |           |
|----|-------------|---------|---------|----------|------------------------------------|----------------------------------------------------------------------------------------------------------------|-----------|
| 29 | PP_01102    | 1172917 | 1173870 | Backward | Hypothetical protein               | PP_01102, hypothetical                                                                                         | N/A       |
| 30 | PP_01103    | 1174484 | 1174996 | Forward  | Hypothetical protein               | PP_01103, hypothetical                                                                                         | N/A       |
| 31 | PP_01104    | 1175491 | 1175949 | Forward  | Terminase                          | PP_01104, terminase small subunit, phage(gi422934327), PHAGE_Bacill_phIS3501_NC_019502                         | 3.34E-22  |
| 32 | PP_01105    | 1175936 | 1177726 | Forward  | Terminase                          | PP_01105, putative terminase large subunit, phage(gi418489114), PHAGE_Lactob_JCL1032_NC_019456                 | 0         |
| 33 | PP_01106    | 1177746 | 1178975 | Forward  | Portal protein                     | PP_01106, portal protein, phage(gi985759335), PHAGE_Bacter_Rani_NC_029084                                      | 1.85E-141 |
| 34 | PP_01107    | 1178947 | 1179666 | Forward  | Protease                           | PP_01107, ATP-dependent Clp protease proteolytic subunit, phage(gi971740652),<br>PHAGE_Paenib_HB10c2_NC_028758 | 1.16E-86  |
| 35 | PP_01108    | 1179669 | 1180814 | Forward  | Head protein                       | PP_01108, major capsid protein, phage(gi971482315), PHAGE_Paenib_Harrison_NC_028746                            | 5.95E-115 |
| 36 | PP_01109    | 1180833 | 1180994 | Forward  | Hypothetical protein               | PP_01109, hypothetical                                                                                         | N/A       |
| 37 | PP_01110    | 1181047 | 1181391 | Forward  | Phage-like protein                 | PP_01110, phage protein DNA packaging protein, phage(gi418489807), PHAGE_Lactob_Sha1_NC_019489                 | 2.59E-07  |
| 38 | PP_01111    | 1181375 | 1181737 | Forward  | Head protein                       | PP_01111, phage head-tail adaptor, phage(gi418489808), PHAGE_Lactob_Sha1_NC_019489                             | 1.30E-83  |
| 39 | PP_01112    | 1181727 | 1182167 | Forward  | Head protein                       | PP_01112, phage head-tail joining protein, phage(gi418489809), PHAGE_Lactob_Sha1_NC_019489                     | 1.04E-99  |
| 40 | PP_01113    | 1182164 | 1182547 | Forward  | Hypothetical protein               | PP_01113, hypothetical protein, phage(gi418489810), PHAGE_Lactob_Sha1_NC_019489                                | 6.70E-84  |
| 41 | PP_01114    | 1182548 | 1183186 | Forward  | Tail protein                       | PP_01114, major tail protein, phage(gi418489811), PHAGE_Lactob_Sha1_NC_019489                                  | 1.13E-144 |
| 42 | PP_01116    | 1183213 | 1183329 | Backward | Hypothetical protein               | PP_01116, hypothetical                                                                                         | N/A       |
| 43 | PP_01115    | 1183388 | 1183771 | Forward  | Hypothetical protein               | PP_01115, hypothetical protein, phage(gi418489812), PHAGE_Lactob_Sha1_NC_019489                                | 3.88E-85  |
| 44 | PP_01117    | 1183768 | 1183959 | Forward  | Hypothetical protein               | PP_01117, hypothetical protein, phage(gi418489813), PHAGE_Lactob_Sha1_NC_019489                                | 3.71E-39  |
| 45 | PP_01118    | 1183972 | 1189194 | Forward  | Tail protein                       | PP_01118, minor tail protein, phage(gi418489814), PHAGE_Lactob_Sha1_NC_019489                                  | 0         |
| 46 | PP_01119    | 1189267 | 1191042 | Forward  | Phage-like protein                 | PP_01119, minor structural protein gp75-like protein, phage(gi418489815), PHAGE_Lactob_Sha1_NC_019489          | 0         |
| 47 | PP_01120    | 1191108 | 1193522 | Forward  | Phage-like protein                 | PP_01120, minor structural protein gp89-like protein, phage(gi418489816), PHAGE_Lactob_Sha1_NC_019489          | 0         |
| 48 | PP_01121    | 1193539 | 1195824 | Forward  | Hypothetical protein               | PP_01121, hypothetical protein, phage(gi100085), PHAGE_Lactob_Satyr_NC_047918                                  | 0         |
| 49 | PP_01122    | 1195802 | 1196053 | Forward  | Hypothetical protein               | PP_01122, hypothetical protein, phage(gi418489818), PHAGE_Lactob_Sha1_NC_019489                                | 1.68E-35  |
| 50 | PP_01123    | 1196057 | 1196218 | Forward  | Hypothetical protein               | PP_01123, hypothetical protein, phage(gi418489819), PHAGE_Lactob_Sha1_NC_019489                                | 1.89E-25  |
| 51 | PP_01124    | 1196202 | 1197299 | Forward  | Phage-like protein                 | PP_01124, prophage Lp2 protein 53-like protein, phage(gi418489820), PHAGE_Lactob_Sha1_NC_019489                | 3.98E-86  |
| 52 | PP_01125    | 1197296 | 1197511 | Forward  | Hypothetical protein               | PP_01125, hypothetical protein, phage(gi985757750), PHAGE_Lactob_LfeSau_NC_029068                              | 6.53E-28  |
| 53 | PP_01126    | 1197525 | 1198697 | Forward  | Phage-like protein                 | PP_01126, endolysin, phage(gi418489821), PHAGE_Lactob_Sha1_NC_019489                                           | 0         |
| 54 | PP_01127    | 1198697 | 1198960 | Forward  | Phage-like protein                 | PP_01127, phage-related holin, phage(gi418489822), PHAGE_Lactob_Sha1_NC_019489                                 | 2.10E-55  |
| 55 | PP_01128    | 1198973 | 1199503 | Forward  | Hypothetical protein               | PP_01128, hypothetical protein, phage(gi418489823), PHAGE_Lactob_Sha1_NC_019489                                | 1.22E-77  |
| 56 | <i>attR</i> | 1200222 | 1200238 | Forward  | Attachment site(AATTATGCCCCAGGCAG) | <i>attR</i>                                                                                                    | N/A       |

Table S4. The third prophage (intact) region elements of *Lactiplantibacillus plantarum* JS21 (PHAGE\_Lactob\_Sha1\_NC\_019489).

| #  | Locus       | ORF Start | ORF Stop | Strand   | Homolog/Ortholog Species      | Homolog/Ortholog Protein                                                                                     | E-Value   |
|----|-------------|-----------|----------|----------|-------------------------------|--------------------------------------------------------------------------------------------------------------|-----------|
| 1  | <i>attL</i> | 1812273   | 1812284  | Forward  | Attachment site(AAACCAAAAAGC) | <i>attL</i>                                                                                                  | N/A       |
| 2  | PP_01770    | 1824504   | 1824878  | Backward | Hypothetical protein          | PP_01770, hypothetical protein, phage(gi100097), PHAGE_Lactob_Lenus_NC_047897                                | 8.54E-46  |
| 3  | PP_01771    | 1824891   | 1825154  | Backward | Phage-like protein            | PP_01771, phage-related holin, phage(gi418489822), PHAGE_Lactob_Sha1_NC_019489                               | 7.74E-54  |
| 4  | PP_01772    | 1825154   | 1826179  | Backward | Phage-like protein            | PP_01772, endolysin, phage(gi418489821), PHAGE_Lactob_Sha1_NC_019489                                         | 0         |
| 5  | PP_01773    | 1826191   | 1826436  | Backward | Hypothetical protein          | PP_01773, hypothetical protein, phage(gi985757750), PHAGE_Lactob_LfeSau_NC_029068                            | 1.89E-28  |
| 6  | PP_01774    | 1826433   | 1827797  | Backward | Phage-like protein            | PP_01774, prophage Lp2 protein 53-like protein, phage(gi418489820), PHAGE_Lactob_Sha1_NC_019489              | 7.00E-78  |
| 7  | PP_01775    | 1827781   | 1827942  | Backward | Hypothetical protein          | PP_01775, hypothetical protein, phage(gi418489819), PHAGE_Lactob_Sha1_NC_019489                              | 3.05E-28  |
| 8  | PP_01776    | 1827946   | 1828188  | Backward | Hypothetical protein          | PP_01776, hypothetical protein, phage(gi418489818), PHAGE_Lactob_Sha1_NC_019489                              | 6.94E-41  |
| 9  | PP_01777    | 1828181   | 1830976  | Backward | Hypothetical protein          | PP_01777, hypothetical protein, phage(gi100085), PHAGE_Lactob_Satyr_NC_047918                                | 0         |
| 10 | PP_01778    | 1830993   | 1833407  | Backward | Phage-like protein            | PP_01778, minor structural protein gp89-like protein, phage(gi418489816),<br>PHAGE_Lactob_Sha1_NC_019489     | 0         |
| 11 | PP_01779    | 1833473   | 1835245  | Backward | Phage-like protein            | PP_01779, minor structural protein gp75-like protein, phage(gi418489815),<br>PHAGE_Lactob_Sha1_NC_019489     | 0         |
| 12 | PP_01780    | 1835305   | 1840203  | Backward | Tail protein                  | PP_01780, putative tail component protein, phage(gi29165636), PHAGE_Strept_DT1_NC_002072                     | 0         |
| 13 | PP_01781    | 1840235   | 1840426  | Backward | Hypothetical protein          | PP_01781, hypothetical protein, phage(gi418489813), PHAGE_Lactob_Sha1_NC_019489                              | 3.26E-07  |
| 14 | PP_01782    | 1840465   | 1840839  | Backward | Hypothetical protein          | PP_01782, hypothetical                                                                                       | N/A       |
| 15 | PP_01783    | 1840914   | 1841567  | Backward | Tail protein                  | PP_01783, putative major tail protein, phage(gi48697269), PHAGE_Lactob_phiAT3_NC_005893                      | 2.59E-22  |
| 16 | PP_01784    | 1841583   | 1841963  | Backward | Tail protein                  | PP_01784, putative tail component, phage(gi48697268), PHAGE_Lactob_phiAT3_NC_005893                          | 2.60E-16  |
| 17 | PP_01785    | 1841963   | 1842370  | Backward | Tail protein                  | PP_01785, putative tail component protein, phage(gi9632427), PHAGE_Strept_DT1_NC_002072                      | 2.08E-35  |
| 18 | PP_01786    | 1842373   | 1842720  | Backward | Head protein                  | PP_01786, putative head-tail joining protein, phage(gi9632902), PHAGE_Strept_Sfi19_NC_000871                 | 2.74E-16  |
| 19 | PP_01787    | 1842710   | 1843042  | Backward | Phage-like protein            | PP_01787, phage protein DNA packaging protein, phage(gi418489807), PHAGE_Lactob_Sha1_NC_019489               | 4.77E-55  |
| 20 | PP_01788    | 1843114   | 1844346  | Backward | Head protein                  | PP_01788, HK97 family phage major capsid protein, phage(gi418489806),<br>PHAGE_Lactob_Sha1_NC_019489         | 0         |
| 21 | PP_01789    | 1844346   | 1845110  | Backward | Protease                      | PP_01789, protease subunit of ATP-dependent Clp protease, phage(gi418489805),<br>PHAGE_Lactob_Sha1_NC_019489 | 1.37E-170 |
| 22 | PP_01790    | 1845088   | 1846251  | Backward | Portal protein                | PP_01790, phage portal protein, phage(gi418489804), PHAGE_Lactob_Sha1_NC_019489                              | 0         |
| 23 | PP_01791    | 1846254   | 1846448  | Backward | Head protein                  | PP_01791, phage head-tail joining protein, phage(gi418489803), PHAGE_Lactob_Sha1_NC_019489                   | 6.73E-35  |
| 24 | PP_01792    | 1846438   | 1847805  | Backward | Terminase                     | PP_01792, phage terminase-like protein large subunit, phage(gi418489802),                                    | 0         |

|    |          |         |         |          |                      |                                                                                                          |           |
|----|----------|---------|---------|----------|----------------------|----------------------------------------------------------------------------------------------------------|-----------|
|    |          |         |         |          |                      | PHAGE_Lactob_Sha1_NC_019489                                                                              |           |
| 25 | PP_01793 | 1847926 | 1849101 | Forward  | Transposase          | PP_01793, transposase, phage(gi26246249), PROPHAGE_Escher_CFT073                                         | 2.25E-62  |
| 26 | PP_01794 | 1849133 | 1849696 | Backward | Terminase            | PP_01794, phage terminase-like protein large subunit, phage(gi418489802),<br>PHAGE_Lactob_Sha1_NC_019489 | 5.27E-104 |
| 27 | PP_01795 | 1849706 | 1850161 | Backward | Terminase            | PP_01795, P27 family phage terminase small subunit, phage(gi418489801),<br>PHAGE_Lactob_Sha1_NC_019489   | 2.19E-106 |
| 28 | PP_01796 | 1850351 | 1850602 | Backward | Hypothetical protein | PP_01796, hypothetical                                                                                   | N/A       |
| 29 | PP_01797 | 1850620 | 1851036 | Backward | Hypothetical protein | PP_01797, hypothetical                                                                                   | N/A       |
| 30 | PP_01798 | 1851042 | 1851512 | Backward | Phage-like protein   | PP_01798, restriction endonuclease, phage(gi418489800), PHAGE_Lactob_Sha1_NC_019489                      | 7.09E-103 |
| 31 | PP_01799 | 1851523 | 1851693 | Backward | Phage-like protein   | PP_01799, HNH nuclease, phage(gi418489799), PHAGE_Lactob_Sha1_NC_019489                                  | 1.66E-32  |
| 32 | PP_01800 | 1851865 | 1852803 | Backward | Hypothetical protein | PP_01800, hypothetical                                                                                   | N/A       |
| 33 | PP_01801 | 1853073 | 1853498 | Backward | Phage-like protein   | PP_01801, phage transcriptional activator RinA, phage(gi418489798), PHAGE_Lactob_Sha1_NC_019489          | 2.44E-86  |
| 34 | PP_01802 | 1853479 | 1853649 | Backward | Phage-like protein   | PP_01802, LP1-like protein, phage(gi418489797), PHAGE_Lactob_Sha1_NC_019489                              | 1.86E-27  |
| 35 | PP_01803 | 1853642 | 1854118 | Backward | Hypothetical protein | PP_01803, hypothetical protein, phage(gi100142), PHAGE_Lactob_Iacchus_NC_048084                          | 2.20E-63  |
| 36 | PP_01804 | 1854115 | 1854531 | Backward | Head protein         | PP_01804, capsid maturation protease, phage(gi100067), PHAGE_Lactob_Lpa804_NC_048134                     | 2.80E-41  |
| 37 | PP_01805 | 1854555 | 1854704 | Backward | Hypothetical protein | PP_01805, hypothetical                                                                                   | N/A       |
| 38 | PP_01806 | 1854750 | 1854863 | Backward | Hypothetical protein | PP_01806, hypothetical protein, phage(gi418489791), PHAGE_Lactob_Sha1_NC_019489                          | 3.19E-07  |
| 39 | PP_01807 | 1854856 | 1855236 | Backward | Phage-like protein   | PP_01807, gp63, phage(gi16798850), PHAGE_Lister_A118_NC_003216                                           | 1.53E-35  |
| 40 | PP_01808 | 1855233 | 1855733 | Backward | Hypothetical protein | PP_01808, hypothetical protein, phage(gi23455787), PHAGE_Lactob_phig1e_NC_004305                         | 1.19E-75  |
| 41 | PP_01809 | 1855869 | 1856654 | Backward | Phage-like protein   | PP_01809, DNA replication protein, phage(gi418489789), PHAGE_Lactob_Sha1_NC_019489                       | 2.69E-175 |
| 42 | PP_01810 | 1856654 | 1857421 | Backward | Fiber protein        | PP_01810, tail fiber protein, phage(gi100052), PHAGE_Bacill_vB_BhaS_171_NC_030904                        | 1.58E-50  |
| 43 | PP_01811 | 1858047 | 1858220 | Backward | Hypothetical protein | PP_01811, hypothetical protein, phage(gi418489841), PHAGE_Lactob_Sha1_NC_019489                          | 5.78E-30  |
| 44 | PP_01812 | 1858232 | 1858432 | Backward | Hypothetical protein | PP_01812, hypothetical protein, phage(gi418489840), PHAGE_Lactob_Sha1_NC_019489                          | 5.20E-36  |
| 45 | PP_01813 | 1858435 | 1858683 | Backward | Hypothetical protein | PP_01813, hypothetical protein, phage(gi418489839), PHAGE_Lactob_Sha1_NC_019489                          | 8.76E-41  |
| 46 | PP_01814 | 1859949 | 1860209 | Backward | Hypothetical protein | PP_01814, hypothetical                                                                                   | N/A       |
| 47 | PP_01815 | 1860267 | 1860488 | Forward  | Hypothetical protein | PP_01815, hypothetical                                                                                   | N/A       |
| 48 | PP_01816 | 1860483 | 1860731 | Backward | Hypothetical protein | PP_01816, hypothetical                                                                                   | N/A       |
| 49 | PP_01817 | 1860745 | 1860954 | Backward | Hypothetical protein | PP_01817, hypothetical protein, phage(gi9633008), PHAGE_Lactob_phiadh_NC_000896                          | 9.80E-06  |
| 50 | PP_01818 | 1860966 | 1861673 | Backward | Phage-like protein   | PP_01818, phage-related antirepressor, phage(gi418489833), PHAGE_Lactob_Sha1_NC_019489                   | 1.43E-36  |
| 51 | PP_01819 | 1861730 | 1861975 | Forward  | Hypothetical protein | PP_01819, hypothetical                                                                                   | N/A       |

|           |                 |                |                |                |                               |                                                                                  |                 |
|-----------|-----------------|----------------|----------------|----------------|-------------------------------|----------------------------------------------------------------------------------|-----------------|
| 52        | PP_01820        | 1862264        | 1862479        | Backward       | Hypothetical protein          | PP_01820, hypothetical                                                           | N/A             |
| 53        | PP_01821        | 1862736        | 1863068        | Forward        | Hypothetical protein          | PP_01821, hypothetical protein, phage(gi100029), PHAGE_Lactob_PLE2_NC_031036     | 7.11E-40        |
| 54        | PP_01822        | 1863061        | 1863468        | Forward        | Hypothetical protein          | PP_01822, hypothetical protein, phage(gi100028), PHAGE_Lactob_PLE2_NC_031036     | 6.39E-39        |
| 55        | PP_01823        | 1863529        | 1864305        | Forward        | Hypothetical protein          | PP_01823, hypothetical                                                           | N/A             |
| 56        | PP_01824        | 1864317        | 1864517        | Forward        | Hypothetical protein          | PP_01824, hypothetical protein, phage(gi418489829), PHAGE_Lactob_Sha1_NC_019489  | 4.61E-36        |
| 57        | PP_01825        | 1864827        | 1865009        | Forward        | Hypothetical protein          | PP_01825, hypothetical                                                           | N/A             |
| 58        | PP_01826        | 1865199        | 1865513        | Forward        | Hypothetical protein          | PP_01826, hypothetical                                                           | N/A             |
| 59        | PP_01827        | 1865710        | 1866285        | Backward       | Hypothetical protein          | PP_01827, hypothetical                                                           | N/A             |
| 60        | <i>attR</i>     | 1866346        | 1866357        | Forward        | Attachment site(AAACCAAAAAGC) | <i>attR</i>                                                                      | N/A             |
| <b>61</b> | <b>PP_01828</b> | <b>1866514</b> | <b>1867677</b> | <b>Forward</b> | <b>Integrase</b>              | <b>PP_01828, phage integrase, phage(gi418489411), PHAGE_Lactob_LF1_NC_019486</b> | <b>5.03E-79</b> |

Table S5. The fourth prophage (incomplete) region elements of *Lactiplantibacillus plantarum* JS21 (PHAGE\_Paenib\_Tripp\_NC\_028930).

| #         | Locus           | ORF Start      | ORF Stop       | Strand         | Homolog/Ortholog Species       | Homolog/Ortholog Protein                                                                 | E-Value         |
|-----------|-----------------|----------------|----------------|----------------|--------------------------------|------------------------------------------------------------------------------------------|-----------------|
| 1         | <i>attL</i>     | 2137180        | 2137192        | Forward        | Attachment site(TTTGGAAAACAAA) | <i>attL</i>                                                                              | N/A             |
| 2         | PP_02105        | 2151081        | 2152970        | Backward       | Phage-like protein             | PP_02105, ABC transporter, phage(gi9630145), PHAGE_Bacill_SPbeta_NC_001884               | 1.07E-30        |
| 3         | PP_02106        | 2152970        | 2154700        | Backward       | Phage-like protein             | PP_02106, ABC transporter, phage(gi9630145), PHAGE_Bacill_SPbeta_NC_001884               | 4.72E-18        |
| 4         | PP_02107        | 2154954        | 2155814        | Backward       | Plate protein                  | PP_02107, putative baseplate hub protein, phage(gi100137), PHAGE_Escher_RCS47_NC_042128  | 3.77E-05        |
| 5         | PP_02108        | 2155841        | 2156293        | Backward       | Hypothetical protein           | PP_02108, hypothetical protein, phage(gi971746471), PHAGE_Staphy_StB20_like_NC_028821    | 9.01E-06        |
| 6         | PP_02109        | 2156409        | 2156840        | Backward       | Transposase                    | PP_02109, transposase, phage(gi971756981), PHAGE_Paenib_Tripp_NC_028930                  | 4.05E-27        |
| 7         | PP_02110        | 2156813        | 2157184        | Backward       | Transposase                    | PP_02110, transposase, phage(gi971756982), PHAGE_Paenib_Tripp_NC_028930                  | 4.19E-36        |
| 8         | PP_02111        | 2157189        | 2157971        | Forward        | Phage-like protein             | PP_02111, chromosome partitioning ATPase, phage(gi418489414), PHAGE_Lactob_LF1_NC_019486 | 8.72E-19        |
| 9         | PP_02112        | 2158186        | 2158353        | Forward        | Hypothetical protein           | PP_02112, hypothetical                                                                   | N/A             |
| 10        | PP_02113        | 2158353        | 2159060        | Forward        | Hypothetical protein           | PP_02113, hypothetical                                                                   | N/A             |
| <b>11</b> | <b>PP_02114</b> | <b>2159223</b> | <b>2160344</b> | <b>Forward</b> | <b>Integrase</b>               | <b>PP_02114, putative integrase, phage(gi937456703), PHAGE_Lactob_LBR48_NC_027990</b>    | <b>1.12E-52</b> |
| 12        | <i>attR</i>     | 2168851        | 2168863        | Forward        | Attachment site(TTTGGAAAACAAA) | <i>attR</i>                                                                              | N/A             |

Table S6. The fifth prophage (incomplete) region elements of *Lactiplantibacillus plantarum* JS21 (PHAGE\_Strept\_APCM01\_NC\_029030).

| #         | Locus           | ORF Start      | ORF Stop       | Strand         | Homolog/Ortholog Species              | Homolog/Ortholog Protein                                                                          | E-Value         |
|-----------|-----------------|----------------|----------------|----------------|---------------------------------------|---------------------------------------------------------------------------------------------------|-----------------|
| 1         | <i>attL</i>     | 2186014        | 2186033        | Forward        | Attachment site(CTCGCCATCTCCATTATTGA) | <i>attL</i>                                                                                       | N/A             |
| 2         | PP_02143        | 2188064        | 2188438        | Backward       | Hypothetical protein                  | PP_02143, hypothetical protein, phage(gi966201497), PHAGE_Strept_T12_NC_028700                    | 1.94E-13        |
| 3         | PP_02144        | 2188725        | 2190140        | Backward       | Hypothetical protein                  | PP_02144, hypothetical protein, phage(gi100019), PHAGE_Clostr_phiCT453A_NC_028991                 | 1.64E-82        |
| 4         | PP_02145        | 2190152        | 2190931        | Backward       | Hypothetical protein                  | PP_02145, hypothetical protein, phage(gi966198623), PHAGE_Strept_Str_PAP_1_NC_028666              | 1.85E-27        |
| 5         | PP_02146        | 2190944        | 2191165        | Backward       | Hypothetical protein                  | PP_02146, hypothetical                                                                            | N/A             |
| 6         | PP_02147        | 2191158        | 2191580        | Backward       | Hypothetical protein                  | PP_02147, hypothetical                                                                            | N/A             |
| 7         | PP_02148        | 2191722        | 2191835        | Backward       | Hypothetical protein                  | PP_02148, hypothetical                                                                            | N/A             |
| 8         | PP_02149        | 2191893        | 2192159        | Backward       | Hypothetical protein                  | PP_02149, hypothetical                                                                            | N/A             |
| 9         | PP_02150        | 2192327        | 2193013        | Backward       | Phage-like protein                    | PP_02150, Orf3, phage(gi13095661), PHAGE_Lactoc_bIL311_NC_002670                                  | 4.99E-19        |
| 10        | PP_02151        | 2193341        | 2193835        | Forward        | Phage-like protein                    | PP_02151, putative transcriptional regulator, phage(gi446730276), PHAGE_Lactob_phiAQ113_NC_019782 | 2.17E-19        |
| <b>11</b> | <b>PP_02152</b> | <b>2193885</b> | <b>2195051</b> | <b>Forward</b> | <b>Integrase</b>                      | <b>PP_02152, integrase, phage(gi23097608), PROPHAGE_Oceano_HTE831</b>                             | <b>2.64E-95</b> |
| 12        | <i>attR</i>     | 2195185        | 2195204        | Forward        | Attachment site(CTCGCCATCTCCATTATTGA) | <i>attR</i>                                                                                       | N/A             |

Table S7. Horizontal gene transfer of prophage region proteins using ProteinBLAST

| S/N                                                                                              | #  | Locus    | ORF Start | ORF Stop | Strand   | Homolog/Ortholog Species | Protein BLAST                                                                                                 | Accession      | E-value                |
|--------------------------------------------------------------------------------------------------|----|----------|-----------|----------|----------|--------------------------|---------------------------------------------------------------------------------------------------------------|----------------|------------------------|
| The first prophage (intact) region elements of <i>Lactiplantibacillus plantarum</i> strain JS21  |    |          |           |          |          |                          |                                                                                                               |                |                        |
| 1                                                                                                | 1  | PP_00028 | 36132     | 36581    | Backward | Hypothetical protein     | pyridoxamine 5'-phosphate oxidase family protein [ <i>Lactiplantibacillus argenteratensis</i> ]               | WP_214334341.1 | <a href="#">7E-103</a> |
| 2                                                                                                | 4  | PP_00031 | 37513     | 38511    | Forward  | Transposase              | IS30 family transposase [ <i>Lactiplantibacillus argenteratensis</i> ]                                        | MBT1142305.1   | 0.0                    |
| 3                                                                                                | 6  | PP_00032 | 38879     | 40033    | Backward | Integrase                | site-specific integrase [ <i>Lactiplantibacillus nangangensis</i> ]                                           | WP_137615032.1 | 0.0                    |
| 4                                                                                                | 7  | PP_00033 | 40086     | 40652    | Backward | Phage-like protein       | helix-turn-helix domain-containing protein [ <i>Lentilactobacillus buchneri</i> ]                             | WP_172884887.1 | 5E-30                  |
| 5                                                                                                | 11 | PP_00037 | 42455     | 43849    | Forward  | Tail protein             | virulence-associated E family protein [ <i>Levilactobacillus brevis</i> ]                                     | WP_087609387.1 | 0.0                    |
| 6                                                                                                | 19 | PP_00045 | 48742     | 49842    | Forward  | Portal protein           | phage portal protein [ <i>Lactiplantibacillus nangangensis</i> ]                                              | WP_137615043.1 | 0.0                    |
| 7                                                                                                | 20 | PP_00046 | 49839     | 51374    | Forward  | Head protein             | phage major capsid protein [ <i>Lactiplantibacillus nangangensis</i> ]                                        | WP_137615044.1 | 0.0                    |
| 8                                                                                                | 21 | PP_00047 | 51488     | 51757    | Forward  | Head protein             | head-tail connector protein [ <i>Lactiplantibacillus xiangfangensis</i> ]                                     | WP_057705766.1 | 1e-56                  |
| 9                                                                                                | 22 | PP_00048 | 51916     | 52284    | Forward  | Hypothetical protein     | hypothetical protein [ <i>Limosilactobacillus reuteri</i> ]                                                   | WP_264508898.1 | 2e-78                  |
| 10                                                                                               | 23 | PP_00049 | 52408     | 52608    | Forward  | Portal protein           | cold-shock protein [ <i>Limosilactobacillus reuteri</i> ]                                                     | WP_169477496.1 | 3e-37                  |
| 11                                                                                               | 25 | PP_00051 | 52931     | 53044    | Forward  | Hypothetical protein     | TPA: hypothetical protein [ <i>Caudoviricetes</i> sp.]                                                        | DAZ29239.1     | 5E-14                  |
| The second prophage (intact) region elements of <i>Lactiplantibacillus plantarum</i> strain JS21 |    |          |           |          |          |                          |                                                                                                               |                |                        |
| 12                                                                                               | 1  | PP_01075 | 1154203   | 1156470  | Forward  | Phage-like protein       | excinuclease ABC subunit UvrA [ <i>Lactiplantibacillus argenteratensis</i> ]                                  | WP_225588668.1 | 0.00E+00               |
| 13                                                                                               | 4  | PP_01077 | 1158655   | 1159170  | Forward  | Hypothetical protein     | DUF2335 domain-containing protein [ <i>Levilactobacillus brevis</i> ]                                         | WP_015474456.1 | 1.00E-101              |
| 14                                                                                               | 5  | PP_01078 | 1159471   | 1159647  | Backward | Hypothetical protein     | exonuclease domain-containing protein [ <i>Levilactobacillus fuyuanensis</i> ]                                | WP_125700023.1 | 5.00E-120              |
| 15                                                                                               | 11 | PP_01084 | 1163305   | 1163493  | Forward  | Phage-like protein       | hypothetical protein [ <i>Lactiplantibacillus argenteratensis</i> ]                                           | WP_285209501.1 | 3.00E-09               |
| 16                                                                                               | 13 | PP_01086 | 1164108   | 1164437  | Forward  | Hypothetical protein     | DUF771 domain-containing protein [ <i>Lactiplantibacillus argenteratensis</i> ]                               | WP_214334453.1 | 1.00E-73               |
| 17                                                                                               | 14 | PP_01087 | 1164527   | 1164781  | Forward  | Hypothetical protein     | hypothetical protein LJA01_21400 [ <i>Lactobacillus japonicus</i> ]                                           | GEK64237.1     | 3.00E-48               |
| 18                                                                                               | 18 | PP_01091 | 1166646   | 1167305  | Forward  | Hypothetical protein     | DUF669 domain-containing protein [ <i>Lactiplantibacillus argenteratensis</i> ]                               | WP_260354589.1 | 7.00E-155              |
| 19                                                                                               | 19 | PP_01092 | 1167352   | 1168044  | Forward  | Hypothetical protein     | hypothetical protein LJA01_21460 [ <i>Lactobacillus japonicus</i> ]                                           | GEK64243.1     | 4.00E-171              |
| 20                                                                                               | 21 | PP_01094 | 1168273   | 1169022  | Backward | Hypothetical protein     | DUF4393 domain-containing protein [ <i>Lactobacillaceae</i> ]                                                 | WP_187357782.1 | 2.00E-54               |
| 21                                                                                               | 22 | PP_01095 | 1169090   | 1169896  | Forward  | Hypothetical protein     | phage replisome organizer N-terminal domain-containing protein [ <i>Lactiplantibacillus argenteratensis</i> ] | WP_214417724.1 | 0.00E+00               |
| 22                                                                                               | 23 | PP_01096 | 1169890   | 1170825  | Forward  | Phage-like protein       | ATP-binding protein [ <i>Lactiplantibacillus argenteratensis</i> ]                                            | WP_244975215.1 | 0.00E+00               |
| 23                                                                                               | 24 | PP_01097 | 1171121   | 1171429  | Forward  | Hypothetical protein     | hypothetical protein [ <i>Lactiplantibacillus fabifermentans</i> ]                                            | WP_033614079.1 | 2.00E-63               |
| 24                                                                                               | 25 | PP_01098 | 1171422   | 1171538  | Forward  | Hypothetical protein     | hypothetical protein LJA01_21510 [ <i>Lactobacillus japonicus</i> ]                                           | GEK64248.1     | 3.00E-14               |
| 25                                                                                               | 26 | PP_01099 | 1171773   | 1171886  | Forward  | Phage-like protein       | hypothetical protein [ <i>Lactiplantibacillus mudanjiangensis</i> ]                                           | WP_130846690.1 | 1.00E-14               |

|                                                                                                 |    |          |         |          |          |                      |                                                                                         |                |           |
|-------------------------------------------------------------------------------------------------|----|----------|---------|----------|----------|----------------------|-----------------------------------------------------------------------------------------|----------------|-----------|
| 26                                                                                              | 27 | PP_01100 | 1171867 | 1172292  | Forward  | Phage-like protein   | transcriptional regulator [ <i>Lactiplantibacillus argenteratensis</i> ]                | WP_253290706.1 | 4.00E-94  |
| 27                                                                                              | 28 | PP_01101 | 1172733 | 1172912  | Forward  | Hypothetical protein | hypothetical protein [ <i>Weissella confusa</i> ]                                       | WP_199402017.1 | 2.00E-08  |
| 28                                                                                              | 29 | PP_01102 | 1172917 | 1173870  | Backward | Hypothetical protein | hypothetical protein [ <i>Weissella cibaria</i> ]                                       | WP_261721978.1 | 1.00E-95  |
| 29                                                                                              | 31 | PP_01104 | 1175491 | 1175949  | Forward  | Terminase            | phage terminase small subunit P27 family [ <i>Lactiplantibacillus mudanjiangensis</i> ] | WP_130852332.1 | 1.00E-101 |
| 30                                                                                              | 32 | PP_01105 | 1175936 | 1177726  | Forward  | Terminase            | terminase large subunit [ <i>Levilactobacillus brevis</i> ]                             | WP_069359847.1 | 0         |
| 31                                                                                              | 33 | PP_01106 | 1177746 | 1178975  | Forward  | Portal protein       | phage portal protein [ <i>Levilactobacillus brevis</i> ]                                | WP_024526686.1 | 0.00E+00  |
| 32                                                                                              | 34 | PP_01107 | 1178947 | 1179666  | Forward  | Protease             | Clp protease ClpP [ <i>Levilactobacillus brevis</i> ]                                   | WP_060416649.1 | 8.00E-170 |
| 33                                                                                              | 35 | PP_01108 | 1179669 | 1180814  | Forward  | Head protein         | phage major capsid protein [ <i>Levilactobacillus brevis</i> ]                          | WP_060416648.1 | 0.00E+00  |
| 34                                                                                              | 37 | PP_01110 | 1181047 | 1181391  | Forward  | Phage-like protein   | head-tail connector protein [ <i>Levilactobacillus brevis</i> ]                         | WP_024526689.1 | 3.00E-70  |
| 35                                                                                              | 40 | PP_01113 | 1182164 | 1182547  | Forward  | Hypothetical protein | tail protein [ <i>Lactobacillus</i> phage Sha1]                                         | YP_007003562.1 | 4.00E-82  |
| 36                                                                                              | 42 | PP_01116 | 1183213 | 1183329  | Backward | Hypothetical protein | TPA: hypothetical protein [ <i>Siphoviridae</i> sp. ctk5O4]                             | DAF51228.1     | 0.019     |
| 37                                                                                              | 43 | PP_01115 | 1183388 | 1183771  | Forward  | Hypothetical protein | hypothetical protein F2048_23865 [ <i>Bacteroides fragilis</i> ]                        | KAA4797547.1   | 9.00E-83  |
| 38                                                                                              | 44 | PP_01117 | 1183768 | 1183959  | Forward  | Hypothetical protein | hypothetical protein [ <i>Loigolactobacillus backii</i> ]                               | WP_143452801.1 | 9.00E-22  |
| 39                                                                                              | 51 | PP_01124 | 1196202 | 1197299  | Forward  | Phage-like protein   | collagen-like protein [ <i>Pediococcus ethanolidurans</i> ]                             | WP_216762492.1 | 0.00E+00  |
| 40                                                                                              | 52 | PP_01125 | 1197296 | 1197511  | Forward  | Hypothetical protein | hypothetical protein [ <i>Levilactobacillus brevis</i> ]                                | WP_216577569.1 | 6.00E-39  |
| 41                                                                                              | 53 | PP_01126 | 1197525 | 1198697  | Forward  | Phage-like protein   | GH25 family lysozyme [ <i>Lactiplantibacillus argenteratensis</i> ]                     | WP_210696722.1 | 0.00E+00  |
| 42                                                                                              | 55 | PP_01128 | 1198973 | 1199503  | Forward  | Hypothetical protein | hypothetical protein [ <i>Lactiplantibacillus fabifermentans</i> ]                      | WP_056993534.1 | 1.00E-111 |
| The third prophage (intact) region elements of <i>Lactiplantibacillus plantarum</i> strain JS21 |    |          |         |          |          |                      |                                                                                         |                |           |
| 43                                                                                              | 2  | PP_01770 | 1824504 | 1824878) | Backward | Hypothetical protein | phage holin [ <i>Lactiplantibacillus argenteratensis</i> ]                              | WP_216491151.1 | 6.00E-74  |
| 44                                                                                              | 5  | PP_01773 | 1826191 | 1826436) | Backward | Hypothetical protein | hypothetical protein [ <i>Lactiplantibacillus xiangfangensis</i> ]                      | WP_057705566.1 | 1.00E-70  |
| 45                                                                                              | 7  | PP_01775 | 1827781 | 1827942) | Backward | Hypothetical protein | hypothetical protein [ <i>Gluconobacter oxydans</i> ]                                   | WP_253441138.1 | 8.00E-48  |
| 46                                                                                              | 9  | PP_01777 | 1828181 | 1830976) | Backward | Hypothetical protein | phage tail protein [ <i>Lactiplantibacillus argenteratensis</i> ]                       | WP_216491148.1 | 0.00E+00  |
| 47                                                                                              | 12 | PP_01780 | 1835305 | 1840203) | Backward | Tail protein         | tape measure protein [ <i>Lactobacillus japonicus</i> ]                                 | GEK64269.1     | 0.00E+00  |
| 48                                                                                              | 14 | PP_01782 | 1840465 | 1840839) | Backward | Hypothetical protein | phage tail assembly chaperone [ <i>Lactiplantibacillus mudanjiangensis</i> ]            | WP_130851912.1 | 9.00E-80  |
| 49                                                                                              | 17 | PP_01785 | 1841963 | 1842370) | Backward | Tail protein         | hypothetical protein LJA01_21670 [ <i>Lactobacillus japonicus</i> ]                     | GEK64264.1     | 4.00E-87  |
| 50                                                                                              | 19 | PP_01787 | 1842710 | 1843042) | Backward | Phage-like protein   | head-tail connector protein [ <i>Lactiplantibacillus mudanjiangensis</i> ]              | WP_130851908.1 | 3.00E-64  |
| 51                                                                                              | 23 | PP_01791 | 1846254 | 1846448) | Backward | Head protein         | DUF1056 family protein [ <i>Lactiplantibacillus argenteratensis</i> ]                   | WP_285209523.1 | 6.00E-34  |
| 52                                                                                              | 24 | PP_01792 | 1846438 | 1847805) | Backward | Terminase            | terminase large subunit [ <i>Pediococcus acidilactici</i> ]                             | WP_159218408.1 | 0.00E+00  |
| 53                                                                                              | 25 | PP_01793 | 1847926 | 1849101  | Forward  | Transposase          | IS256 family transposase [ <i>Fructilactobacillus sanfranciscensis</i> ]                | WP_238979325.1 | 0.00E+00  |
| 54                                                                                              | 26 | PP_01794 | 1849133 | 1849696) | Backward | Terminase            | terminase large subunit [ <i>Bacteroides fragilis</i> ]                                 | KAA4797499.1   | 8.00E-123 |



|                                                                                                      |    |          |         |          |          |                      |                                                                                                                |                |          |
|------------------------------------------------------------------------------------------------------|----|----------|---------|----------|----------|----------------------|----------------------------------------------------------------------------------------------------------------|----------------|----------|
| 55                                                                                                   | 29 | PP_01797 | 1850620 | 1851036) | Backward | Hypothetical protein | hypothetical protein [ <i>Levilactobacillus brevis</i> ]                                                       | WP_060463300.1 | 1.00E-62 |
| 56                                                                                                   | 31 | PP_01799 | 1851523 | 1851693) | Backward | Phage-like protein   | hypothetical protein [ <i>Lactiplantibacillus argenteratensis</i> ]                                            | WP_214334474.1 | 2e-30    |
| 57                                                                                                   | 33 | PP_01801 | 1853073 | 1853498) | Backward | Phage-like protein   | RinA family transcriptional regulator [ <i>Lactiplantibacillus fabifermentans</i> DSM 21115]                   | KRO24919.1     | 3e-89    |
| 58                                                                                                   | 36 | PP_01804 | 1854115 | 1854531) | Backward | Head protein         | YopX family protein [ <i>Lactiplantibacillus argenteratensis</i> ]                                             | MBU5277831.1   | 2e-82    |
| 59                                                                                                   | 40 | PP_01808 | 1855233 | 1855733) | Backward | Hypothetical protein | hypothetical protein [ <i>Lentilactobacillus parabuchneri</i> ]                                                | WP_301521624.1 | 7e-94    |
| 60                                                                                                   | 41 | PP_01809 | 1855869 | 1856654) | Backward | Phage-like protein   | ATP-binding protein [ <i>Lactiplantibacillus argenteratensis</i> ]                                             | WP_216491080.1 | 0.0      |
| 61                                                                                                   | 46 | PP_01814 | 1859949 | 1860209  | Backward | Hypothetical protein | hypothetical protein DY78_GL000849 [ <i>Lactiplantibacillus fabifermentans</i> DSM 21115]                      | KRO26535.1     | 2e-40    |
| 62                                                                                                   | 51 | PP_01819 | 1861730 | 1861975  | Forward  | Hypothetical protein | hypothetical protein [ <i>Limosilactobacillus reuteri</i> ]                                                    | WP_143449772.1 | 8e-43    |
| 63                                                                                                   | 56 | PP_01824 | 1864317 | 1864517  | Forward  | Hypothetical protein | capsule polysaccharide transpoter [ <i>Lactobacillus delbrueckii</i> subsp. <i>bulgaricus</i> ]                | MBT9072018.1   | 4e-06    |
| 64                                                                                                   | 57 | PP_01825 | 1864827 | 1865009  | Forward  | Hypothetical protein | hypothetical protein [ <i>Lactiplantibacillus argenteratensis</i> ]                                            | WP_285209498.1 | 2e-32    |
| The fourth prophage (incomplete) region elements of <i>Lactiplantibacillus plantarum</i> strain JS21 |    |          |         |          |          |                      |                                                                                                                |                |          |
| 65                                                                                                   | 2  | PP_02105 | 2151081 | 2152970  | Backward | Phage-like protein   | Select seq dbj GEK64508.1  multidrug ABC transporter ATP-binding protein<br>[ <i>Lactobacillus japonicus</i> ] | GEK64508.1     | 0.0      |
| 66                                                                                                   | 4  | PP_02107 | 2154954 | 2155814  | Backward | Plate protein        | IS982 family transposase [ <i>Levilactobacillus parabrevis</i> ]                                               | WP_260340338.1 | 0.0      |
| 67                                                                                                   | 6  | PP_02109 | 2156409 | 2156840  | Backward | Transposase          | Transposase [ <i>Levilactobacillus brevis</i> ATCC 367]                                                        | ABJ64411.1     | 2e-102   |
| 68                                                                                                   | 7  | PP_02110 | 2156813 | 2157184  | Backward | Transposase          | Transposase [ <i>Levilactobacillus brevis</i> ATCC 367]                                                        | ABJ64410.1     | 5e-84    |
| 69                                                                                                   | 8  | PP_02111 | 2157189 | 2157971  | Forward  | Phage-like protein   | ParA family protein [ <i>Latilactobacillus curvatus</i> ]                                                      | WP_221276490.1 | 2e-108   |
| 70                                                                                                   | 10 | PP_02113 | 2158353 | 2159060  | Forward  | Hypothetical protein | Select seq ref WP_139960858.1  hypothetical protein [ <i>Levilactobacillus brevis</i> ]                        | WP_139960858.1 | 1e-67    |
| The fifth prophage (incomplete) region elements of <i>Lactiplantibacillus plantarum</i> strain JS21  |    |          |         |          |          |                      |                                                                                                                |                |          |
| 71                                                                                                   | 8  | PP_02149 | 2191893 | 2192159  | Backward | Hypothetical protein | helix-turn-helix domain-containing protein [ <i>Lactiplantibacillus mudanjiangensis</i> ]                      | WP_130846642.1 | 2e-30    |

Table S8. The predicted transposases of the JS21 genome by using IS Finder

| #  | Sequences producing significant alignments | IS Family | Group | Origin                          | Score(bits) | E. value |
|----|--------------------------------------------|-----------|-------|---------------------------------|-------------|----------|
| 1  | ISP2                                       | IS1182    | IS427 | <i>Lactobacillus plantarum</i>  | 3356        | 0        |
| 2  | ISP1                                       | ISL3      |       | <i>Lactobacillus plantarum</i>  | 2809        | 0        |
| 3  | IS1310                                     | IS256     |       | <i>Enterococcus hirae</i>       | 2216        | 0        |
| 4  | ISLpl1                                     | IS30      |       | <i>Lactobacillus plantarum</i>  | 2028        | 0        |
| 5  | ISPP1                                      | IS30      |       | <i>Pediococcus pentosaceus</i>  | 1925        | 0        |
| 6  | ISLpl3                                     | IS5       | IS150 | <i>Lactobacillus plantarum</i>  | 1643        | 0        |
| 7  | ISLhe30                                    | IS30      |       | <i>Lactobacillus helveticus</i> | 1473        | 0        |
| 8  | ISLsa1                                     | IS30      |       | <i>Lactobacillus sakei</i>      | 1372        | 0        |
| 9  | ISLpl2                                     | IS3       |       | <i>Lactobacillus plantarum</i>  | 61.9        | 0.000006 |
| 10 | ISBame1                                    | IS256     |       | <i>Bacillus megaterium</i>      | 58          | 0.0001   |

TableS9. Match between antibiotic resistance gene search using KofamKOALA (KEGG Orthology) web servers and phenotypic antibiotic resistance results

| Antibiotic group | Antibiotic           | Inhibition zone diameter/status | Antibiotic Resistance Genes                     |                                                                                                                                    |           |
|------------------|----------------------|---------------------------------|-------------------------------------------------|------------------------------------------------------------------------------------------------------------------------------------|-----------|
|                  |                      |                                 | KofamKOALA(ver. 2023-06-07, KEGG release 106.0) |                                                                                                                                    |           |
|                  |                      |                                 | Gene                                            | Product                                                                                                                            | E-value   |
| β-Lactams        | Penicillin G (10U)   | 19.9 (S)                        | <i>pbp2A</i>                                    | penicillin-binding protein 2A [EC:2.4.1.129 3.4.16.4]                                                                              | 2.70E-287 |
|                  |                      |                                 | <i>penP</i>                                     | beta-lactamase class A [EC:3.5.2.6]                                                                                                | 8.40E-51  |
|                  | Ampicillin (10μg)    | 34.70 (S)                       | <i>abcA</i>                                     | ATP-binding cassette, subfamily B, bacterial AbcA/BmrA [EC:7.6.2.2]                                                                | 4.30E-204 |
|                  |                      |                                 | <i>oppA</i>                                     | oligopeptide transport system substrate-binding protein                                                                            | 7.00E-141 |
|                  | Amoxicillin (20μg)   | 34.29 (S)                       | <i>oppB</i>                                     | oligopeptide transport system permease protein                                                                                     | 6.20E-123 |
|                  |                      |                                 | <i>oppC</i>                                     | oligopeptide transport system permease protein                                                                                     | 1.70E-113 |
|                  | Cefotaxime (30μg)    | 32.93 (S)                       | <i>oppD</i>                                     | oligopeptide transport system ATP-binding protein                                                                                  | 1.20E-197 |
|                  |                      |                                 | <i>oppF</i>                                     | oligopeptide transport system ATP-binding protein                                                                                  | 2.40E-161 |
| Aminoglycosides  | Kanamycin (30μg)     | ≤13(R)                          | -                                               | -                                                                                                                                  | -         |
|                  | Gentamicin (10μg)    | 16.98 (S)                       | -                                               | -                                                                                                                                  | -         |
| Macrolides       | Erythromycin (15μg)  | 25.48 (S)                       | -                                               | -                                                                                                                                  | -         |
| Tetracyclines    | Tetracycline (30μg)  | 20.99 (S)                       | <i>tetM</i>                                     | ribosomal protection tetracycline resistance protein                                                                               | 2.10E-276 |
|                  | Minocycline (30μg)   | 24.00mm (S)                     | -                                               | -                                                                                                                                  | -         |
| 4-quinolones     | Ciprofloxacin (5μg)  | ≤15 (R)                         | -                                               | -                                                                                                                                  | -         |
|                  | Norfloxacin (10μg)   | ≤12 (R)                         | -                                               | -                                                                                                                                  | -         |
|                  | Enrofloxacin (10μg)  | 14.18 (I)                       | -                                               | -                                                                                                                                  | -         |
| Glycopeptides    | Vancomycin (30μg)    | ≤14 (R)                         | <i>vanX</i>                                     | zinc D-Ala-D-Ala dipeptidase [EC:3.4.13.22]                                                                                        | 3.90E-61  |
|                  |                      |                                 | <i>vanY</i>                                     | zinc D-Ala-D-Ala carboxypeptidase [EC:3.4.17.14]                                                                                   | 2.60E-50  |
|                  |                      |                                 | <i>alr</i>                                      | alanine racemase [EC:5.1.1.1]                                                                                                      | 3.30E-129 |
|                  |                      |                                 | <i>ddl</i>                                      | D-alanine-D-alanine ligase [EC:6.3.2.4]                                                                                            | 3.90E-109 |
|                  |                      |                                 | <i>mraY</i>                                     | phospho-N-acetylmuramoyl-pentapeptide-transferase [EC:2.7.8.13]                                                                    | 3.50E-119 |
|                  |                      |                                 | <i>murF</i>                                     | UDP-N-acetylmuramoyl-tripeptide--D-alanyl-D-alanine ligase [EC:6.3.2.10]                                                           | 1.40E-147 |
|                  |                      |                                 | <i>murG</i>                                     | UDP-N-acetylglucosamine--N-acetylmuramyl-(pentapeptide) pyrophosphoryl-undecaprenol N-acetylglucosamine transferase [EC:2.4.1.227] | 2.10E-128 |
| sulfa drugs      | Sulffurazole (300μg) | ≤12 (R)                         | -                                               | -                                                                                                                                  | -         |
| Lincomycin       | Lincomycin           | Not tested                      | <i>lmrB</i>                                     | MFS transporter, DHA2 family, lincomycin resistance protein                                                                        | 4.60E-139 |

Table S10. Horizontal gene transfer screenING for antibiotic resistance genes

| Antibiotic   | Gene         | Protein BLAST result                                                                                                     | Accession      | Identity | E-Value |
|--------------|--------------|--------------------------------------------------------------------------------------------------------------------------|----------------|----------|---------|
| β-Lactams    | <i>pbp2A</i> | PBP1A family penicillin-binding protein [ <i>Lactiplantibacillus plantarum</i> ]                                         | QSE53449.1     | 99%      | 0.0     |
|              | <i>penP</i>  | serine hydrolase [ <i>Lactiplantibacillus plantarum</i> ]                                                                | WP_011101017.1 | 100.00%  | 0.0     |
| Tetracycline | <i>tetM</i>  | TetM/TetW/TetO/TetS family tetracycline resistance ribosomal protection protein [ <i>Lactiplantibacillus plantarum</i> ] | WP_027822280.1 | 100.00%  | 0.0     |
| Lincomycin   | <i>lmrB</i>  | DHA2 family efflux MFS transporter permease subunit [ <i>Lactiplantibacillus plantarum</i> ]                             | WP_015640444.1 | 100.00%  | 0.0     |
| Vancomycin   | <i>vanX</i>  | M15 family metallopeptidase [ <i>Lactiplantibacillus plantarum</i> ]                                                     | WP_015825207.1 | 100.00%  | 3e-134  |
|              | <i>vanY</i>  | M15 family metallopeptidase [ <i>Lactiplantibacillus plantarum</i> ]                                                     | WP_016511489.1 | 100.00%  | 3e-180  |
|              | <i>alr</i>   | alanine racemase [ <i>Lactiplantibacillus plantarum</i> ]                                                                | GJI53677.1     | 100.00%  | 0.0     |
|              | <i>ddl</i>   | D-alanine--D-alanine ligase [ <i>Lactiplantibacillus plantarum</i> ZJ316]                                                | AGE39858.1     | 99.73%   | 0.0     |
|              | <i>mraY</i>  | phospho-N-acetylmuramoyl-pentapeptide-transferase [ <i>Lactiplantibacillus plantarum</i> ]                               | WP_003640859.1 | 100.00%  | 0.0     |
|              | <i>murF</i>  | UDP-N-acetylmuramoyl-tripeptide--D-alanyl-D-alanine ligase [ <i>Lactiplantibacillus plantarum</i> ]                      | WP_003643844.1 | 99.78%   | 0.0     |
|              | <i>murG</i>  | undecaprenyldiphospho-muramoylpentapeptide beta-N-acetylglucosaminyltransferase [ <i>Lactiplantibacillus plantarum</i> ] | WP_003640857.1 | 100.00%  | 0.0     |
| Efflux pumps | <i>efrB</i>  | ABC transporter ATP-binding protein [ <i>Lactiplantibacillus plantarum</i> ]                                             | WP_111443160.1 | 99.84%   | 0.0     |
|              | <i>efrA</i>  | ABC transporter ATP-binding protein [ <i>Lactiplantibacillus plantarum</i> ]                                             | WP_003641422.1 | 100.00%  | 0.0     |
|              | <i>mdlB</i>  | Lipid A export ATP-binding/permease proteinMsbA [ <i>Lactiplantibacillus plantarum</i> ]                                 | KZU11536.1     | 99.83%   | 0.0     |
|              | <i>mdlA</i>  | ABC transporter transmembrane domain-containing protein [ <i>Lactiplantibacillus plantarum</i> ]                         | WP_016511510.1 | 100.00%  | 0.0     |
|              | <i>patB</i>  | ABC transporter ATP-binding protein [ <i>Lactiplantibacillus plantarum</i> ]                                             | WP_249391052.1 | 99.83%   | 0.0     |
|              | <i>patA</i>  | ABC transporter ATP-binding protein [ <i>Lactiplantibacillus plantarum</i> ]                                             | WP_027822837.1 | 100.00%  | 0.0     |
|              | <i>abcA</i>  | ABC transporter ATP-binding protein [ <i>Lactiplantibacillus plantarum</i> ]                                             | WP_054519139.1 | 100.00%  | 0.0     |
|              | <i>oppA</i>  | peptide ABC transporter substrate-binding protein [ <i>Lactiplantibacillus plantarum</i> ]                               | WP_072533228.1 | 99.81%   | 0.0     |
|              | <i>oppB</i>  | ABC transporter permease [ <i>Lactiplantibacillus plantarum</i> ]                                                        | WP_072536085.1 | 99.68%   | 0.0     |
|              | <i>oppC</i>  | ABC transporter permease [ <i>Lactiplantibacillus plantarum</i> ]                                                        | WP_259610052.1 | 99.71%   | 0.0     |
|              | <i>oppD</i>  | ABC transporter ATP-binding protein [ <i>Lactiplantibacillus plantarum</i> ]                                             | WP_260390669.1 | 100.00%  | 0.0     |
|              | <i>oppF</i>  | ATP-binding cassette domain-containing protein [ <i>Lactiplantibacillus plantarum</i> ]                                  | WP_131072774.1 | 99%      | 0.0     |
|              | <i>blt</i>   | tetracycline resistance MFS efflux pump [ <i>Lactiplantibacillus plantarum</i> ]                                         | WP_003641027.1 | 100%     | 0.0     |
|              | <i>mdtG</i>  | MFS transporter [ <i>Lactiplantibacillus plantarum</i> ]                                                                 | WP_211758286.1 | 100%     | 0.0     |

Table S11. Carbohydrate metabolism genes annotated by KEGG orthology

| Glycolysis / Gluconeogenesis |                                 |               |                                                                                                            |             |
|------------------------------|---------------------------------|---------------|------------------------------------------------------------------------------------------------------------|-------------|
| #                            | Symbol                          | KEGG Entry    | Definition                                                                                                 | Copy Number |
| 1                            | E1.1.1.1, <i>adh</i>            | K00001        | alcohol dehydrogenase [EC:1.1.1.1]                                                                         | 3           |
| 2                            | <i>adhE</i>                     | K04072        | acetaldehyde dehydrogenase / alcohol dehydrogenase [EC:1.2.1.10 1.1.1.1]                                   | 2           |
| 3                            | <b>FBA, <i>fbaA</i></b>         | <b>K01624</b> | <b>fructose-bisphosphate aldolase, class II [EC:4.1.2.13]</b>                                              | <b>1</b>    |
| 4                            | LDH, <i>ldh</i>                 | K00016        | L-lactate dehydrogenase [EC:1.1.1.27]                                                                      | 6           |
| 5                            | E3.2.1.86B, <i>bglA</i>         | K01223        | 6-phospho-beta-glucosidase [EC:3.2.1.86]                                                                   | 7           |
| 6                            | PGAM, <i>gpmA</i>               | K01834        | 2,3-bisphosphoglycerate-dependent phosphoglycerate mutase [EC:5.4.2.11]                                    | 2           |
| 7                            | <i>pgm</i>                      | K01835        | phosphoglucomutase [EC:5.4.2.2]                                                                            | 1           |
| 8                            | GAPDH, <i>gapA</i>              | K00134        | glyceraldehyde 3-phosphate dehydrogenase (phosphorylating) [EC:1.2.1.12]                                   | 1           |
| 9                            | PGK, <i>pgk</i>                 | K00927        | phosphoglycerate kinase [EC:2.7.2.3]                                                                       | 1           |
| 10                           | TPI, <i>tpiA</i>                | K01803        | triosephosphate isomerase (TIM) [EC:5.3.1.1]                                                               | 1           |
| 11                           | ENO, <i>eno</i>                 | K01689        | enolase [EC:4.2.1.11]                                                                                      | 2           |
| 12                           | <b><i>galM</i>, GALM</b>        | <b>K01785</b> | <b>aldose 1-epimerase [EC:5.1.3.3]</b>                                                                     | <b>3</b>    |
| 13                           | <i>crr</i>                      | K02777        | sugar PTS system EIIA component [EC:2.7.1.-]                                                               | 2           |
| 14                           | <i>glk</i>                      | K25026        | glucokinase [EC:2.7.1.2]                                                                                   | 1           |
| 15                           | PK, <i>pyk</i>                  | K00873        | pyruvate kinase [EC:2.7.1.40]                                                                              | 1           |
| 16                           | <b><i>pfkA</i>, PFK</b>         | <b>K00850</b> | <b>6-phosphofructokinase 1 [EC:2.7.1.11]</b>                                                               | <b>1</b>    |
| 17                           | <i>pps</i> , <i>ppsA</i>        | K01007        | pyruvate, water dikinase [EC:2.7.9.2]                                                                      | 1           |
| 18                           | DLD, <i>lpd</i> , <i>pdhD</i>   | K00382        | dihydrolipoamide dehydrogenase [EC:1.8.1.4]                                                                | 1           |
| 19                           | DLAT, <i>aceF</i> , <i>pdhC</i> | K00627        | pyruvate dehydrogenase E2 component (dihydrolipoamide acetyltransferase) [EC:2.3.1.12]                     | 1           |
| 20                           | PDHB, <i>pdhB</i>               | K00162        | pyruvate dehydrogenase E1 component beta subunit [EC:1.2.4.1]                                              | 1           |
| 21                           | PDHA, <i>pdhA</i>               | K00161        | pyruvate dehydrogenase E1 component alpha subunit [EC:1.2.4.1]                                             | 1           |
| 22                           | <b>GPI, <i>pgi</i></b>          | <b>K01810</b> | <b>glucose-6-phosphate isomerase [EC:5.3.1.9]</b>                                                          | <b>1</b>    |
| 23                           | E4.1.1.49, <i>pckA</i>          | K01610        | phosphoenolpyruvate carboxykinase (ATP) [EC:4.1.1.49]                                                      | 1           |
| Citrate cycle (TCA cycle)    |                                 |               |                                                                                                            |             |
| #                            | Symbol                          | KEGG Entry    | Definition                                                                                                 | Copy Number |
| 1                            | E4.2.1.2B, <i>fumC</i> , FH     | K01679        | fumarate hydratase, class II [EC:4.2.1.2]                                                                  | 1           |
| 2                            | PC, <i>pyc</i>                  | K01958        | pyruvate carboxylase [EC:6.4.1.1]                                                                          | 1           |
| 3                            | DLD, <i>lpd</i> , <i>pdhD</i>   | K00382        | dihydrolipoamide dehydrogenase [EC:1.8.1.4]                                                                | 1           |
| 4                            | DLAT, <i>aceF</i> , <i>pdhC</i> | K00627        | pyruvate dehydrogenase E2 component (dihydrolipoamide acetyltransferase) [EC:2.3.1.12]                     | 1           |
| 5                            | PDHB, <i>pdhB</i>               | K00162        | pyruvate dehydrogenase E1 component beta subunit [EC:1.2.4.1]                                              | 1           |
| 6                            | PDHA, <i>pdhA</i>               | K00161        | pyruvate dehydrogenase E1 component alpha subunit [EC:1.2.4.1]                                             | 1           |
| 7                            | E4.1.1.49, <i>pckA</i>          | K01610        | phosphoenolpyruvate carboxykinase (ATP) [EC:4.1.1.49]                                                      | 1           |
| Pentose phosphate pathway    |                                 |               |                                                                                                            |             |
| #                            | Symbol                          | KEGG Entry    | Definition                                                                                                 | Copy Number |
| 1                            | <b>FBA, <i>fbaA</i></b>         | <b>K01624</b> | <b>fructose-bisphosphate aldolase, class II [EC:4.1.2.13]</b>                                              | <b>1</b>    |
| 2                            | <i>rpiA</i>                     | K01807        | ribose 5-phosphate isomerase A [EC:5.3.1.6]                                                                | 2           |
| 3                            | PRPS, <i>prsA</i>               | K00948        | ribose-phosphate pyrophosphokinase [EC:2.7.6.1]                                                            | 2           |
| 4                            | <i>eda</i>                      | K01625        | 2-dehydro-3-deoxyphosphogluconate aldolase / (4S)-4-hydroxy-2-oxoglutarate aldolase [EC:4.1.2.14 4.1.3.42] | 1           |
| 5                            | <i>pgm</i>                      | K01835        | phosphoglucomutase [EC:5.4.2.2]                                                                            | 1           |

|    |                                     |               |                                                                                 |          |
|----|-------------------------------------|---------------|---------------------------------------------------------------------------------|----------|
| 6  | E2.2.1.1, <i>tktA</i> , <i>tktB</i> | K00615        | transketolase [EC:2.2.1.1]                                                      | 1        |
| 7  | <i>gntK</i>                         | K25031        | gluconokinase [EC:2.7.1.12]                                                     | 1        |
| 8  | PGD, <i>gnd</i> , <i>gntZ</i>       | K00033        | 6-phosphogluconate dehydrogenase [EC:1.1.1.44 1.1.1.343]                        | 2        |
| 9  | <b><i>rpe</i>, RPE</b>              | <b>K01783</b> | <b>ribulose-phosphate 3-epimerase [EC:5.1.3.1]</b>                              | <b>1</b> |
| 10 | <b><i>pfkA</i>, PFK</b>             | <b>K00850</b> | <b>6-phosphofructokinase 1 [EC:2.7.1.11]</b>                                    | <b>1</b> |
| 11 | <i>pgl</i>                          | K07404        | 6-phosphogluconolactonase [EC:3.1.1.31]                                         | 1        |
| 12 | <i>rbsK</i> , RBKS                  | K00852        | ribokinase [EC:2.7.1.15]                                                        | 2        |
| 13 | <b>GPI, <i>pgi</i></b>              | <b>K01810</b> | <b>glucose-6-phosphate isomerase [EC:5.3.1.9]</b>                               | <b>1</b> |
| 14 | <i>xfp</i> , <i>xpk</i>             | K01621        | xylulose-5-phosphate/fructose-6-phosphate phosphoketolase [EC:4.1.2.9 4.1.2.22] | 1        |
| 15 | G6PD, <i>zwf</i>                    | K00036        | glucose-6-phosphate 1-dehydrogenase [EC:1.1.1.49 1.1.1.363]                     | 1        |

#### Pentose and glucuronate interconversions

| # | Symbol                                | KEGG<br>Entry | Definition                                                       | Copy<br>Number |
|---|---------------------------------------|---------------|------------------------------------------------------------------|----------------|
| 1 | <b>UGP2, <i>galU</i>, <i>galF</i></b> | <b>K00963</b> | <b>UTP--glucose-1-phosphate uridylyltransferase [EC:2.7.7.9]</b> | <b>1</b>       |
| 2 | <b><i>rpe</i>, RPE</b>                | <b>K01783</b> | <b>ribulose-phosphate 3-epimerase [EC:5.1.3.1]</b>               | <b>1</b>       |
| 3 | <i>tarI</i>                           | K21030        | D-ribitol-5-phosphate cytidylyltransferase [EC:2.7.7.40]         | 1              |
| 4 | E1.1.1.137                            | K21680        | ribulose-5-phosphate 2-dehydrogenase [EC:1.1.1.137]              | 1              |

#### Fructose and mannose metabolism

| #  | Symbol                    | KEGG<br>Entry | Definition                                                                                 | Copy<br>Number |
|----|---------------------------|---------------|--------------------------------------------------------------------------------------------|----------------|
| 1  | DAK, TKFC                 | K00863        | triose/dihydroxyacetone kinase / FAD-AMP lyase (cyclizing) [EC:2.7.1.28 2.7.1.29 4.6.1.15] | 1              |
| 2  | E2.7.1.4, <i>scrK</i>     | K00847        | fructokinase [EC:2.7.1.4]                                                                  | 2              |
| 3  | <i>mtlA</i> , <i>cmtA</i> | K02800        | mannitol PTS system EIICBA or EIICB component [EC:2.7.1.197]                               | 1              |
| 4  | <i>cmtB</i>               | K02798        | mannitol PTS system EIIA component [EC:2.7.1.197]                                          | 1              |
| 5  | <i>mtlD</i>               | K00009        | mannitol-1-phosphate 5-dehydrogenase [EC:1.1.1.17]                                         | 1              |
| 6  | <b>FBA, <i>fbaA</i></b>   | <b>K01624</b> | <b>fructose-bisphosphate aldolase, class II [EC:4.1.2.13]</b>                              | <b>1</b>       |
| 7  | <i>manX</i>               | K02794        | mannose PTS system EIIB component [EC:2.7.1.191]                                           | 1              |
| 8  | <i>manY</i>               | K02795        | mannose PTS system EIIC component                                                          | 1              |
| 9  | <i>manZ</i>               | K02796        | mannose PTS system EIID component                                                          | 1              |
| 10 | <i>manXa</i>              | K02793        | mannose PTS system EIIA component [EC:2.7.1.191]                                           | 2              |
| 11 | <i>fruAb</i>              | K02769        | fructose PTS system EIIB component [EC:2.7.1.202]                                          | 2              |
| 12 | TPI, <i>tpiA</i>          | K01803        | triosephosphate isomerase (TIM) [EC:5.3.1.1]                                               | 1              |
| 13 | <b><i>pfkA</i>, PFK</b>   | <b>K00850</b> | <b>6-phosphofructokinase 1 [EC:2.7.1.11]</b>                                               | <b>1</b>       |
| 14 | <i>fruK</i>               | K00882        | 1-phosphofructokinase [EC:2.7.1.56]                                                        | 1              |
| 15 | <i>fruA</i>               | K02770        | fructose PTS system EIIBC or EIIC component [EC:2.7.1.202]                                 | 2              |
| 16 | <i>srlB</i>               | K02781        | glucitol/sorbitol PTS system EIIA component [EC:2.7.1.198]                                 | 2              |
| 17 | <i>manA</i> , MPI         | K01809        | mannose-6-phosphate isomerase [EC:5.3.1.8]                                                 | 1              |
| 18 | <i>fruB</i>               | K02768        | fructose PTS system EIIA component [EC:2.7.1.202]                                          | 1              |
| 19 | <i>srlE</i>               | K02782        | glucitol/sorbitol PTS system EIIB component [EC:2.7.1.198]                                 | 1              |
| 20 | <i>srlA</i>               | K02783        | glucitol/sorbitol PTS system EIIC component                                                | 1              |
| 21 | <i>srlD</i>               | K00068        | sorbitol-6-phosphate 2-dehydrogenase [EC:1.1.1.140]                                        | 1              |

#### Galactose metabolism

| # | Symbol                                | KEGG<br>Entry | Definition                        | Copy<br>Number |
|---|---------------------------------------|---------------|-----------------------------------|----------------|
| 1 | <i>malZ</i>                           | K01187        | alpha-glucosidase [EC:3.2.1.20]   | 1              |
| 2 | E3.2.1.22B, <i>galA</i> , <i>rafA</i> | K07407        | alpha-galactosidase [EC:3.2.1.22] | 3              |

| 3                                 | INV, <i>sacA</i>                                      | K01193        | beta-fructofuranosidase [EC:3.2.1.26]                            | 1              |
|-----------------------------------|-------------------------------------------------------|---------------|------------------------------------------------------------------|----------------|
| 4                                 | IMA, <i>malL</i>                                      | K01182        | oligo-1,6-glucosidase [EC:3.2.1.10]                              | 2              |
| 5                                 | <i>galE</i> , GALE                                    | K01784        | UDP-glucose 4-epimerase [EC:5.1.3.2]                             | 3              |
| 6                                 | UGP2, <i>galU</i> , <i>galF</i>                       | K00963        | UTP--glucose-1-phosphate uridylyltransferase [EC:2.7.7.9]        | 1              |
| 7                                 | <i>pgm</i>                                            | K01835        | phosphoglucomutase [EC:5.4.2.2]                                  | 1              |
| 8                                 | <i>galM</i> , GALM                                    | K01785        | aldose 1-epimerase [EC:5.1.3.3]                                  | 3              |
| 9                                 | <i>glk</i>                                            | K25026        | glucokinase [EC:2.7.1.2]                                         | 1              |
| 10                                | <b><i>pfkA</i>, PFK</b>                               | <b>K00850</b> | <b>6-phosphofructokinase 1 [EC:2.7.1.11]</b>                     | <b>1</b>       |
| 11                                | <i>agaF</i>                                           | K02744        | N-acetylgalactosamine PTS system EIIA component [EC:2.7.1.-]     | 1              |
| 12                                | <i>agaD</i>                                           | K10986        | galactosamine PTS system EIID component                          | 1              |
| 13                                | <i>agaC</i>                                           | K10985        | galactosamine PTS system EIIC component                          | 1              |
| 14                                | <i>agaB</i>                                           | K10984        | galactosamine PTS system EIIB component [EC:2.7.1.-]             | 1              |
| 15                                | <i>bgaB</i> , <i>lacA</i>                             | K12308        | beta-galactosidase [EC:3.2.1.23]                                 | 2              |
| 16                                | <i>galT</i> , GALT                                    | K00965        | UDPglucose--hexose-1-phosphate uridylyltransferase [EC:2.7.7.12] | 1              |
| 17                                | <i>galK</i>                                           | K00849        | galactokinase [EC:2.7.1.6]                                       | 1              |
| 18                                | <i>lacZ</i>                                           | K01190        | beta-galactosidase [EC:3.2.1.23]                                 | 2              |
| Ascorbate and aldarate metabolism |                                                       |               |                                                                  |                |
| #                                 | Symbol                                                | KEGG<br>Entry | Definition                                                       | Copy<br>Number |
| 1                                 | <i>ulaC</i> , <i>sgaA</i>                             | K02821        | ascorbate PTS system EIIA or EIIB component [EC:2.7.1.194]       | 1              |
| 2                                 | <i>ulaB</i> , <i>sgaB</i>                             | K02822        | ascorbate PTS system EIIB component [EC:2.7.1.194]               | 1              |
| 3                                 | <i>ulaA</i> , <i>sgaT</i>                             | K03475        | ascorbate PTS system EIIC component                              | 1              |
| Starch and sucrose metabolism     |                                                       |               |                                                                  |                |
| #                                 | Symbol                                                | KEGG<br>Entry | Definition                                                       | Copy<br>Number |
| 1                                 | GBE1, <i>glgB</i>                                     | K00700        | 1,4-alpha-glucan branching enzyme [EC:2.4.1.18]                  | 2              |
| 2                                 | <i>glgC</i>                                           | K00975        | glucose-1-phosphate adenyltransferase [EC:2.7.7.27]              | 5              |
| 3                                 | <i>glgA</i>                                           | K00703        | starch synthase [EC:2.4.1.21]                                    | 3              |
| 4                                 | PYG, <i>glgP</i>                                      | K00688        | glycogen phosphorylase [EC:2.4.1.1]                              | 3              |
| 5                                 | <i>pgmB</i>                                           | K01838        | beta-phosphoglucomutase [EC:5.4.2.6]                             | 2              |
| 6                                 | <i>malZ</i>                                           | K01187        | alpha-glucosidase [EC:3.2.1.20]                                  | 1              |
| 7                                 | AMY, <i>amyA</i> , <i>malS</i>                        | K01176        | alpha-amylase [EC:3.2.1.1]                                       | 1              |
| 8                                 | <i>mapA</i>                                           | K00691        | maltose phosphorylase [EC:2.4.1.8]                               | 2              |
| 9                                 | E2.7.1.4, <i>scrK</i>                                 | K00847        | fructokinase [EC:2.7.1.4]                                        | 2              |
| 10                                | <i>scrA</i> , <i>sacP</i> , <i>sacX</i> , <i>ptsS</i> | K02810        | sucrose PTS system EIIBC or EIIBC component [EC:2.7.1.211]       | 2              |
| 11                                | INV, <i>sacA</i>                                      | K01193        | beta-fructofuranosidase [EC:3.2.1.26]                            | 1              |
| 12                                | IMA, <i>malL</i>                                      | K01182        | oligo-1,6-glucosidase [EC:3.2.1.10]                              | 2              |
| 13                                | <i>treC</i>                                           | K01226        | trehalose-6-phosphate hydrolase [EC:3.2.1.93]                    | 1              |
| 14                                | <i>celB</i> , <i>chbC</i>                             | K02761        | cellobiose PTS system EIIC component                             | 12             |
| 15                                | E3.2.1.86B, <i>bglA</i>                               | K01223        | 6-phospho-beta-glucosidase [EC:3.2.1.86]                         | 7              |
| 16                                | UGP2, <i>galU</i> , <i>galF</i>                       | K00963        | UTP--glucose-1-phosphate uridylyltransferase [EC:2.7.7.9]        | 1              |
| 17                                | <i>pgm</i>                                            | K01835        | phosphoglucomutase [EC:5.4.2.2]                                  | 1              |
| 18                                | <i>crr</i>                                            | K02777        | sugar PTS system EIIA component [EC:2.7.1.-]                     | 2              |
| 19                                | <i>celC</i> , <i>chbA</i>                             | K02759        | cellobiose PTS system EIIA component [EC:2.7.1.196 2.7.1.205]    | 3              |
| 20                                | <i>celA</i> , <i>chbB</i>                             | K02760        | cellobiose PTS system EIIB component [EC:2.7.1.196 2.7.1.205]    | 4              |

| 21                                          | <i>glk</i>                      | K25026        | glucokinase [EC:2.7.1.2]                                                                                                     | 1              |
|---------------------------------------------|---------------------------------|---------------|------------------------------------------------------------------------------------------------------------------------------|----------------|
| <b>22</b>                                   | <b>GPI, <i>pgi</i></b>          | <b>K01810</b> | <b>glucose-6-phosphate isomerase [EC:5.3.1.9]</b>                                                                            | <b>1</b>       |
| 23                                          | <i>cd, ma, nplT</i>             | K01208        | cyclomaltodextrinase / maltogenic alpha-amylase / neopullulanase [EC:3.2.1.54 3.2.1.133 3.2.1.135]                           | 1              |
| Amino sugar and nucleotide sugar metabolism |                                 |               |                                                                                                                              |                |
| #                                           | Symbol                          | KEGG<br>Entry | Definition                                                                                                                   | Copy<br>Number |
| 1                                           | <i>glgC</i>                     | K00975        | glucose-1-phosphate adenylyltransferase [EC:2.7.7.27]                                                                        | 5              |
| 2                                           | E2.7.1.4, <i>scrK</i>           | K00847        | fructokinase [EC:2.7.1.4]                                                                                                    | 2              |
| 3                                           | <i>nagB</i> , GNPDA             | K02564        | glucosamine-6-phosphate deaminase [EC:3.5.99.6]                                                                              | 1              |
| 4                                           | <i>glmU</i>                     | K04042        | bifunctional UDP-N-acetylglucosamine pyrophosphorylase / glucosamine-1-phosphate N-acetyltransferase [EC:2.7.7.23 2.3.1.157] | 1              |
| 5                                           | <i>murA</i>                     | K00790        | UDP-N-acetylglucosamine 1-carboxyvinyltransferase [EC:2.5.1.7]                                                               | 2              |
| 6                                           | <i>nagA</i> , AMDHD2            | K01443        | N-acetylglucosamine-6-phosphate deacetylase [EC:3.5.1.25]                                                                    | 1              |
| 7                                           | <i>manX</i>                     | K02794        | mannose PTS system EIIB component [EC:2.7.1.191]                                                                             | 1              |
| 8                                           | <i>manY</i>                     | K02795        | mannose PTS system EIIC component                                                                                            | 1              |
| 9                                           | <i>manZ</i>                     | K02796        | mannose PTS system EIID component                                                                                            | 1              |
| 10                                          | <i>manXa</i>                    | K02793        | mannose PTS system EIIA component [EC:2.7.1.191]                                                                             | 2              |
| 11                                          | <i>galE</i> , GALE              | K01784        | UDP-glucose 4-epimerase [EC:5.1.3.2]                                                                                         | 3              |
| 12                                          | UGP2, <i>galU</i> , <i>galF</i> | K00963        | UTP--glucose-1-phosphate uridylyltransferase [EC:2.7.7.9]                                                                    | 1              |
| 13                                          | <i>pgm</i>                      | K01835        | phosphoglucomutase [EC:5.4.2.2]                                                                                              | 1              |
| 14                                          | <i>murB</i>                     | K00075        | UDP-N-acetylmuramate dehydrogenase [EC:1.3.1.98]                                                                             | 1              |
| 15                                          | <i>glmM</i>                     | K03431        | phosphoglucosamine mutase [EC:5.4.2.10]                                                                                      | 1              |
| 16                                          | <i>glmS</i> , GFPT              | K00820        | glutamine---fructose-6-phosphate transaminase (isomerizing) [EC:2.6.1.16]                                                    | 1              |
| 17                                          | <i>mupP</i>                     | K22292        | N-acetyl-D-muramate 6-phosphate phosphatase [EC:3.1.3.105]                                                                   | 1              |
| 18                                          | <i>crr</i>                      | K02777        | sugar PTS system EIIA component [EC:2.7.1.-]                                                                                 | 2              |
| 19                                          | <i>wecB</i>                     | K01791        | UDP-N-acetylglucosamine 2-epimerase (non-hydrolysing) [EC:5.1.3.14]                                                          | 1              |
| 20                                          | <i>glk</i>                      | K25026        | glucokinase [EC:2.7.1.2]                                                                                                     | 1              |
| 21                                          | <i>manA</i> , MPI               | K01809        | mannose-6-phosphate isomerase [EC:5.3.1.8]                                                                                   | 1              |
| <b>22</b>                                   | <b>GPI, <i>pgi</i></b>          | <b>K01810</b> | <b>glucose-6-phosphate isomerase [EC:5.3.1.9]</b>                                                                            | <b>1</b>       |
| 23                                          | <i>nagE</i>                     | K02804        | N-acetylglucosamine PTS system EIICBA or EIICB component [EC:2.7.1.193]                                                      | 2              |
| 24                                          | <i>galT</i> , GALT              | K00965        | UDPglucose--hexose-1-phosphate uridylyltransferase [EC:2.7.7.12]                                                             | 1              |
| 25                                          | <i>galK</i>                     | K00849        | galactokinase [EC:2.7.1.6]                                                                                                   | 1              |
| 26                                          | <i>murQ</i>                     | K07106        | N-acetylmuramic acid 6-phosphate etherase [EC:4.2.1.126]                                                                     | 1              |
| 27                                          | <i>nanE</i>                     | K01788        | N-acylglucosamine-6-phosphate 2-epimerase [EC:5.1.3.9]                                                                       | 1              |
| Pyruvate metabolism                         |                                 |               |                                                                                                                              |                |
| #                                           | Symbol                          | KEGG<br>Entry | Definition                                                                                                                   | Copy<br>Number |
| 1                                           | E1.1.1.1, <i>adh</i>            | K00001        | alcohol dehydrogenase [EC:1.1.1.1]                                                                                           | 3              |
| 2                                           | <i>larA</i>                     | K22373        | lactate racemase [EC:5.1.2.1]                                                                                                | 1              |
| 3                                           | <i>ackA</i>                     | K00925        | acetate kinase [EC:2.7.2.1]                                                                                                  | 3              |
| 4                                           | <i>adhE</i>                     | K04072        | acetaldehyde dehydrogenase / alcohol dehydrogenase [EC:1.2.1.10 1.1.1.1]                                                     | 2              |
| 5                                           | LDH, <i>ldh</i>                 | K00016        | L-lactate dehydrogenase [EC:1.1.1.27]                                                                                        | 6              |
| 6                                           | <i>accB</i> , <i>bccP</i>       | K02160        | acetyl-CoA carboxylase biotin carboxyl carrier protein                                                                       | 3              |
| 7                                           | <i>accC</i>                     | K01961        | acetyl-CoA carboxylase, biotin carboxylase subunit [EC:6.4.1.2 6.3.4.14]                                                     | 2              |
| 8                                           | <i>accD</i>                     | K01963        | acetyl-CoA carboxylase carboxyl transferase subunit beta [EC:6.4.1.2 2.1.3.15]                                               | 2              |



|    |                             |        |                                                                                        |   |
|----|-----------------------------|--------|----------------------------------------------------------------------------------------|---|
| 9  | <i>accA</i>                 | K01962 | acetyl-CoA carboxylase carboxyl transferase subunit alpha [EC:6.4.1.2 2.1.3.15]        | 2 |
| 10 | <i>pta</i>                  | K00625 | phosphate acetyltransferase [EC:2.3.1.8]                                               | 1 |
| 11 | <i>spxB, poxL</i>           | K00158 | pyruvate oxidase [EC:1.2.3.3]                                                          | 5 |
| 12 | <i>ldhA</i>                 | K03778 | D-lactate dehydrogenase [EC:1.1.1.28]                                                  | 2 |
| 13 | ME2, <i>sfcA, maeA</i>      | K00027 | malate dehydrogenase (oxaloacetate-decarboxylating) [EC:1.1.1.38]                      | 1 |
| 14 | E4.2.1.2B, <i>fumC</i> , FH | K01679 | fumarate hydratase, class II [EC:4.2.1.2]                                              | 1 |
| 15 | <i>mleA, mleS</i>           | K22212 | malolactic enzyme [EC:4.1.1.101]                                                       | 1 |
| 16 | <i>acyP</i>                 | K01512 | acylphosphatase [EC:3.6.1.7]                                                           | 1 |
| 17 | PK, <i>pyk</i>              | K00873 | pyruvate kinase [EC:2.7.1.40]                                                          | 1 |
| 18 | <i>pps, ppsA</i>            | K01007 | pyruvate, water dikinase [EC:2.7.9.2]                                                  | 1 |
| 19 | PC, <i>pyc</i>              | K01958 | pyruvate carboxylase [EC:6.4.1.1]                                                      | 1 |
| 20 | DLD, <i>lpd, pdhD</i>       | K00382 | dihydrolipoamide dehydrogenase [EC:1.8.1.4]                                            | 1 |
| 21 | DLAT, <i>aceF, pdhC</i>     | K00627 | pyruvate dehydrogenase E2 component (dihydrolipoamide acetyltransferase) [EC:2.3.1.12] | 1 |
| 22 | PDHB, <i>pdhB</i>           | K00162 | pyruvate dehydrogenase E1 component beta subunit [EC:1.2.4.1]                          | 1 |
| 23 | PDHA, <i>pdhA</i>           | K00161 | pyruvate dehydrogenase E1 component alpha subunit [EC:1.2.4.1]                         | 1 |
| 24 | E2.3.1.54, <i>pflD</i>      | K00656 | formate C-acetyltransferase [EC:2.3.1.54]                                              | 1 |
| 25 | E4.1.1.49, <i>pckA</i>      | K01610 | phosphoenolpyruvate carboxykinase (ATP) [EC:4.1.1.49]                                  | 1 |

#### Glyoxylate and dicarboxylate metabolism

| #  | Symbol                               | KEGG<br>Entry | Definition                                                                                                 | Copy<br>Number |
|----|--------------------------------------|---------------|------------------------------------------------------------------------------------------------------------|----------------|
| 1  | <i>glcD</i>                          | K00104        | glycolate oxidase [EC:1.1.3.15]                                                                            | 1              |
| 2  | <i>gcvH</i> , GCSH                   | K02437        | glycine cleavage system H protein                                                                          | 2              |
| 3  | <i>eda</i>                           | K01625        | 2-dehydro-3-deoxyphosphogluconate aldolase / (4S)-4-hydroxy-2-oxoglutarate aldolase [EC:4.1.2.14 4.1.3.42] | 1              |
| 4  | <i>ttdB</i>                          | K03780        | L(+)-tartrate dehydratase beta subunit [EC:4.2.1.32]                                                       | 1              |
| 5  | <i>ttdA</i>                          | K03779        | L(+)-tartrate dehydratase alpha subunit [EC:4.2.1.32]                                                      | 1              |
| 6  | <i>glnA</i> , GLUL                   | K01915        | glutamine synthetase [EC:6.3.1.2]                                                                          | 1              |
| 7  | <i>gph</i>                           | K01091        | phosphoglycolate phosphatase [EC:3.1.3.18]                                                                 | 1              |
| 8  | DLD, <i>lpd, pdhD</i>                | K00382        | dihydrolipoamide dehydrogenase [EC:1.8.1.4]                                                                | 1              |
| 9  | <i>glyA</i> , SHMT                   | K00600        | glycine hydroxymethyltransferase [EC:2.1.2.1]                                                              | 1              |
| 10 | <i>glxK, garK</i>                    | K00865        | glycerate 2-kinase [EC:2.7.1.165]                                                                          | 1              |
| 11 | <i>katE</i> , CAT, <i>catB, srpA</i> | K03781        | catalase [EC:1.11.1.6]                                                                                     | 1              |

#### Propanoate metabolism

| #  | Symbol                 | KEGG<br>Entry | Definition                                                                      | Copy<br>Number |
|----|------------------------|---------------|---------------------------------------------------------------------------------|----------------|
| 1  | <i>ackA</i>            | K00925        | acetate kinase [EC:2.7.2.1]                                                     | 3              |
| 2  | LDH, <i>ldh</i>        | K00016        | L-lactate dehydrogenase [EC:1.1.1.27]                                           | 6              |
| 3  | <i>accB, bccP</i>      | K02160        | acetyl-CoA carboxylase biotin carboxyl carrier protein                          | 3              |
| 4  | <i>accC</i>            | K01961        | acetyl-CoA carboxylase, biotin carboxylase subunit [EC:6.4.1.2 6.3.4.14]        | 2              |
| 5  | <i>accD</i>            | K01963        | acetyl-CoA carboxylase carboxyl transferase subunit beta [EC:6.4.1.2 2.1.3.15]  | 2              |
| 6  | <i>accA</i>            | K01962        | acetyl-CoA carboxylase carboxyl transferase subunit alpha [EC:6.4.1.2 2.1.3.15] | 2              |
| 7  | <i>pta</i>             | K00625        | phosphate acetyltransferase [EC:2.3.1.8]                                        | 1              |
| 8  | DLD, <i>lpd, pdhD</i>  | K00382        | dihydrolipoamide dehydrogenase [EC:1.8.1.4]                                     | 1              |
| 9  | <i>dhaT</i>            | K00086        | 1,3-propanediol dehydrogenase [EC:1.1.1.202]                                    | 1              |
| 10 | E2.3.1.54, <i>pflD</i> | K00656        | formate C-acetyltransferase [EC:2.3.1.54]                                       | 1              |

| C5-Branched dibasic acid metabolism |                                                    |               |                                                                                                             |                |
|-------------------------------------|----------------------------------------------------|---------------|-------------------------------------------------------------------------------------------------------------|----------------|
| #                                   | Symbol                                             | KEGG<br>Entry | Definition                                                                                                  | Copy<br>Number |
| 1                                   | E2.2.1.6L, <i>ilvB</i> , <i>ilvG</i> , <i>ilvI</i> | K01652        | acetolactate synthase I/II/III large subunit [EC:2.2.1.6]                                                   | 1              |
| 2                                   | <i>alsD</i> , <i>budA</i> , <i>aldC</i>            | K01575        | acetolactate decarboxylase [EC:4.1.1.5]                                                                     | 1              |
| Inositol phosphate metabolism       |                                                    |               |                                                                                                             |                |
| #                                   | Symbol                                             | KEGG<br>Entry | Definition                                                                                                  | Copy<br>Number |
| 1                                   | TPI, <i>tpiA</i>                                   | K01803        | triosephosphate isomerase (TIM) [EC:5.3.1.1]                                                                | 1              |
| 2                                   | E3.1.3.25, IMPA, <i>suhB</i>                       | K01092        | myo-inositol-1(or 4)-monophosphatase [EC:3.1.3.25]                                                          | 1              |
| 3                                   | <i>iolU</i>                                        | K22230        | scyllo-inositol 2-dehydrogenase (NADP+) [EC:1.1.1.-]                                                        | 3              |
| 4                                   | <i>iolI</i>                                        | K06606        | 2-keto-myo-inositol isomerase [EC:5.3.99.11]                                                                | 2              |
| 5                                   | <i>iolG</i>                                        | K00010        | myo-inositol 2-dehydrogenase / D-chiro-inositol 1-dehydrogenase [EC:1.1.1.18 1.1.1.369]                     | 7              |
| 6                                   | <i>iolE</i>                                        | K03335        | inosose dehydratase [EC:4.2.1.44]                                                                           | 1              |
| Butanoate metabolism                |                                                    |               |                                                                                                             |                |
| #                                   | Symbol                                             | KEGG<br>Entry | Definition                                                                                                  | Copy<br>Number |
| 1                                   | <i>adc</i>                                         | K01574        | acetoacetate decarboxylase [EC:4.1.1.4]                                                                     | 1              |
| 2                                   | <i>adhE</i>                                        | K04072        | acetaldehyde dehydrogenase / alcohol dehydrogenase [EC:1.2.1.10 1.1.1.1]                                    | 2              |
| 3                                   | E2.2.1.6L, <i>ilvB</i> , <i>ilvG</i> , <i>ilvI</i> | K01652        | acetolactate synthase I/II/III large subunit [EC:2.2.1.6]                                                   | 1              |
| 4                                   | <i>alsD</i> , <i>budA</i> , <i>aldC</i>            | K01575        | acetolactate decarboxylase [EC:4.1.1.5]                                                                     | 1              |
| 5                                   | HMGCS                                              | K01641        | hydroxymethylglutaryl-CoA synthase [EC:2.3.3.10]                                                            | 1              |
| 6                                   | <i>gabD</i>                                        | K00135        | succinate-semialdehyde dehydrogenase / glutarate-semialdehyde dehydrogenase [EC:1.2.1.16 1.2.1.79 1.2.1.20] | 1              |
| 7                                   | E2.3.1.54, <i>pflD</i>                             | K00656        | formate C-acetyltransferase [EC:2.3.1.54]                                                                   | 1              |
| 8                                   | E4.1.1.15, <i>gadB</i> , <i>gadA</i> ,<br>GAD      | K01580        | glutamate decarboxylase [EC:4.1.1.15]                                                                       | 1              |

Table S12. KEGG (BlastKOALA) orthology search results for ABC transporters

| #  | Symbol                                    | KEGG Entry    | Definition                                                                                 | Copy Number |
|----|-------------------------------------------|---------------|--------------------------------------------------------------------------------------------|-------------|
| 1  | <b><i>oppA, mppA</i></b>                  | <b>K15580</b> | <b>oligopeptide transport system substrate-binding protein</b>                             | <b>8</b>    |
| 2  | <i>cbiO</i>                               | K02006        | cobalt/nickel transport system ATP-binding protein                                         | 2           |
| 3  | <i>cbiM</i>                               | K02007        | cobalt/nickel transport system permease protein                                            | 1           |
| 4  | <i>ecfT</i>                               | K16785        | energy-coupling factor transport system permease protein                                   | 3           |
| 5  | <i>cycB, ganO, mdxE</i>                   | K15770        | arabinogalactan oligomer / maltooligosaccharide transport system substrate-binding protein | 1           |
| 6  | <i>ganP, mdxF</i>                         | K15771        | arabinogalactan oligomer / maltooligosaccharide transport system permease protein          | 1           |
| 7  | <i>ganQ, mdxG</i>                         | K15772        | arabinogalactan oligomer / maltooligosaccharide transport system permease protein          | 1           |
| 8  | <i>msmX, msmK, malK, sugC, ggtA, msiK</i> | K10112        | multiple sugar transport system ATP-binding protein [EC:7.5.2.-]                           | 1           |
| 9  | <i>msr, vmlR</i>                          | K18231        | macrolide transport system ATP-binding/permease protein                                    | 1           |
| 10 | <i>potD</i>                               | K11069        | spermidine/putrescine transport system substrate-binding protein                           | 1           |
| 11 | <i>potC</i>                               | K11070        | spermidine/putrescine transport system permease protein                                    | 1           |
| 12 | <i>potB</i>                               | K11071        | spermidine/putrescine transport system permease protein                                    | 1           |
| 13 | <i>potA</i>                               | K11072        | spermidine/putrescine transport system ATP-binding protein [EC:7.6.2.11]                   | 1           |
| 14 | <i>ytrB</i>                               | K16921        | acetoin utilization transport system ATP-binding protein                                   | 2           |
| 15 | <i>ytrC_D</i>                             | K16919        | acetoin utilization transport system permease protein                                      | 1           |
| 16 | <i>bioY</i>                               | K03523        | biotin transport system substrate-specific component                                       | 1           |
| 17 | <i>metQ</i>                               | K02073        | D-methionine transport system substrate-binding protein                                    | 3           |
| 18 | <i>metN</i>                               | K02071        | D-methionine transport system ATP-binding protein                                          | 3           |
| 19 | <i>metI</i>                               | K02072        | D-methionine transport system permease protein                                             | 3           |
| 20 | <i>tagG</i>                               | K09692        | teichoic acid transport system permease protein                                            | 1           |
| 21 | <i>tagH</i>                               | K09693        | teichoic acid transport system ATP-binding protein [EC:7.5.2.4]                            | 1           |
| 22 | <i>opuC</i>                               | K05845        | osmoprotectant transport system substrate-binding protein                                  | 2           |
| 23 | <i>opuA</i>                               | K05847        | osmoprotectant transport system ATP-binding protein [EC:7.6.2.9]                           | 2           |
| 24 | <i>blpA, lagD</i>                         | K20344        | ATP-binding cassette, subfamily C, bacteriocin exporter                                    | 2           |
| 25 | <i>phnE</i>                               | K02042        | phosphonate transport system permease protein                                              | 2           |
| 26 | <i>phnC</i>                               | K02041        | phosphonate transport system ATP-binding protein [EC:7.3.2.2]                              | 1           |
| 27 | <i>phnD</i>                               | K02044        | phosphonate transport system substrate-binding protein                                     | 1           |
| 28 | <i>pstS</i>                               | K02040        | phosphate transport system substrate-binding protein                                       | 2           |
| 29 | <i>pstC</i>                               | K02037        | phosphate transport system permease protein                                                | 1           |
| 30 | <i>pstA</i>                               | K02038        | phosphate transport system permease protein                                                | 1           |
| 31 | <i>pstB</i>                               | K02036        | phosphate transport system ATP-binding protein [EC:7.3.2.1]                                | 2           |
| 32 | <i>glnH</i>                               | K10036        | glutamine transport system substrate-binding protein                                       | 2           |
| 33 | <i>glnQ</i>                               | K10038        | glutamine transport system ATP-binding protein [EC:7.4.2.1]                                | 3           |
| 34 | <i>peb1A, glnH</i>                        | K10039        | aspartate/glutamate/glutamine transport system substrate-binding protein                   | 1           |
| 35 | <i>peb1B, glnP, glnM</i>                  | K10040        | aspartate/glutamate/glutamine transport system permease protein                            | 2           |
| 36 | <i>ecfA1</i>                              | K16786        | energy-coupling factor transport system ATP-binding protein [EC:7.-.-.]                    | 1           |
| 37 | <i>ecfA2</i>                              | K16787        | energy-coupling factor transport system ATP-binding protein [EC:7.-.-.]                    | 1           |
| 38 | <i>mntA</i>                               | K19973        | manganese transport system ATP-binding protein [EC:7.2.2.5]                                | 1           |
| 39 | <i>mntB</i>                               | K19976        | manganese transport system permease protein                                                | 1           |
| 40 | <i>mntC</i>                               | K19975        | manganese transport system substrate-binding protein                                       | 1           |
| 41 | <i>cydD</i>                               | K16013        | ATP-binding cassette, subfamily C, bacterial CydD                                          | 1           |
| 42 | <i>cydC</i>                               | K16012        | ATP-binding cassette, subfamily C, bacterial CydC                                          | 1           |

|    |                               |        |                                                                             |   |
|----|-------------------------------|--------|-----------------------------------------------------------------------------|---|
| 43 | <i>oppB</i>                   | K15581 | oligopeptide transport system permease protein                              | 2 |
| 44 | <i>oppC</i>                   | K15582 | oligopeptide transport system permease protein                              | 2 |
| 45 | <i>oppD</i>                   | K15583 | oligopeptide transport system ATP-binding protein                           | 2 |
| 46 | <i>oppF</i>                   | K10823 | oligopeptide transport system ATP-binding protein                           | 2 |
| 47 | <i>ugpC</i>                   | K05816 | sn-glycerol 3-phosphate transport system ATP-binding protein [EC:7.6.2.10]  | 1 |
| 48 | <i>ugpA</i>                   | K05814 | sn-glycerol 3-phosphate transport system permease protein                   | 1 |
| 49 | <i>ugpE</i>                   | K05815 | sn-glycerol 3-phosphate transport system permease protein                   | 2 |
| 50 | <i>ugpB</i>                   | K05813 | sn-glycerol 3-phosphate transport system substrate-binding protein          | 1 |
| 51 | <i>opuBD</i>                  | K05846 | osmoprotectant transport system permease protein                            | 2 |
| 52 | <i>afuB, fbpB</i>             | K02011 | iron(III) transport system permease protein                                 | 1 |
| 53 | <i>afuA, fbpA</i>             | K02012 | iron(III) transport system substrate-binding protein                        | 1 |
| 54 | <i>afuC, fbpC</i>             | K02010 | iron(III) transport system ATP-binding protein [EC:7.2.2.7]                 | 1 |
| 55 | <i>artR, artM</i>             | K23060 | arginine/lysine/histidine transport system ATP-binding protein [EC:7.4.2.1] | 1 |
| 56 | <i>artQ</i>                   | K17077 | arginine/lysine/histidine transport system permease protein                 | 1 |
| 57 | <i>efrB, efrF</i>             | K18888 | ATP-binding cassette, subfamily B, multidrug efflux pump                    | 1 |
| 58 | <i>efrA, efrE</i>             | K18887 | ATP-binding cassette, subfamily B, multidrug efflux pump                    | 1 |
| 59 | <i>abcA, bmrA</i>             | K18104 | ATP-binding cassette, subfamily B, bacterial AbcA/BmrA [EC:7.6.2.2]         | 2 |
| 60 | <i>mdlB, smdB</i>             | K18890 | ATP-binding cassette, subfamily B, multidrug efflux pump                    | 1 |
| 61 | <i>mdlA, smdA</i>             | K18889 | ATP-binding cassette, subfamily B, multidrug efflux pump                    | 1 |
| 62 | <i>livF</i>                   | K01996 | branched-chain amino acid transport system ATP-binding protein              | 1 |
| 63 | <i>livG</i>                   | K01995 | branched-chain amino acid transport system ATP-binding protein              | 1 |
| 64 | <i>livM</i>                   | K01998 | branched-chain amino acid transport system permease protein                 | 1 |
| 65 | <i>livH</i>                   | K01997 | branched-chain amino acid transport system permease protein                 | 1 |
| 66 | <i>livK</i>                   | K01999 | branched-chain amino acid transport system substrate-binding protein        | 1 |
| 67 | <i>patB, rscB, lmrC, satB</i> | K18892 | ATP-binding cassette, subfamily B, multidrug efflux pump                    | 1 |
| 68 | <i>patA, rscA, lmrC, satA</i> | K18891 | ATP-binding cassette, subfamily B, multidrug efflux pump                    | 1 |
| 69 | <i>tcyA, tcyJ, fliY</i>       | K02424 | L-cystine transport system substrate-binding protein                        | 2 |
| 70 | <i>tcyB, tcyL</i>             | K10009 | L-cystine transport system permease protein                                 | 1 |
| 71 | <i>tcyC, tcyN</i>             | K10010 | L-cystine transport system ATP-binding protein [EC:7.4.2.1]                 | 1 |
| 72 | <i>rbsD</i>                   | K06726 | D-ribose pyranase [EC:5.4.99.62]                                            | 1 |

Table S13. Phosphotransferase system (PTS) annotated by KEGG (BlastKOALA)

| #  | Symbol                        | KEGG<br>Entry | Definition                                                                        | Copy<br>Number |
|----|-------------------------------|---------------|-----------------------------------------------------------------------------------|----------------|
| 1  | <i>scrA, sacP, sacX, ptsS</i> | K02810        | sucrose PTS system EIIBCA or EIIBC component [EC:2.7.1.211]                       | 2              |
| 2  | <i>mtlA, cmtA</i>             | K02800        | mannitol PTS system EIICBA or EIICB component [EC:2.7.1.197]                      | 1              |
| 3  | <i>cmtB</i>                   | K02798        | mannitol PTS system EIIA component [EC:2.7.1.197]                                 | 1              |
| 4  | <i>bglF, bglP</i>             | K02757        | beta-glucoside PTS system EIICBA component [EC:2.7.1.-]                           | 5              |
| 5  | <i>celB, chbC</i>             | K02761        | cellobiose PTS system EIIC component                                              | 12             |
| 6  | <i>manX</i>                   | K02794        | mannose PTS system EIIB component [EC:2.7.1.191]                                  | 1              |
| 7  | <i>manY</i>                   | K02795        | mannose PTS system EIIC component                                                 | 1              |
| 8  | <i>manZ</i>                   | K02796        | mannose PTS system EIID component                                                 | 1              |
| 9  | <i>manXa</i>                  | K02793        | mannose PTS system EIIA component [EC:2.7.1.191]                                  | 2              |
| 10 | <i>fruAb</i>                  | K02769        | fructose PTS system EIIB component [EC:2.7.1.202]                                 | 2              |
| 11 | <i>ulaC, sgaA</i>             | K02821        | ascorbate PTS system EIIB component [EC:2.7.1.194]                                | 1              |
| 12 | <i>ulaB, sgaB</i>             | K02822        | ascorbate PTS system EIIB component [EC:2.7.1.194]                                | 1              |
| 13 | <i>ulaA, sgaT</i>             | K03475        | ascorbate PTS system EIIC component                                               | 1              |
| 14 | <i>crr</i>                    | K02777        | sugar PTS system EIIB component [EC:2.7.1.-]                                      | 2              |
| 15 | <i>celC, chbA</i>             | K02759        | cellobiose PTS system EIIB component [EC:2.7.1.196 2.7.1.205]                     | 3              |
| 16 | <i>ptsH</i>                   | K02784        | phosphocarrier protein HPr                                                        | 1              |
| 17 | <i>ptsI</i>                   | K08483        | phosphoenolpyruvate-protein phosphotransferase (PTS system enzyme I) [EC:2.7.3.9] | 1              |
| 18 | <i>celA, chbB</i>             | K02760        | cellobiose PTS system EIIB component [EC:2.7.1.196 2.7.1.205]                     | 4              |
| 19 | <i>fruK</i>                   | K00882        | 1-phosphofructokinase [EC:2.7.1.56]                                               | 1              |
| 20 | <i>fruA</i>                   | K02770        | fructose PTS system EIIB or EIIC component [EC:2.7.1.202]                         | 2              |
| 21 | <i>srlB</i>                   | K02781        | glucitol/sorbitol PTS system EIIB component [EC:2.7.1.198]                        | 2              |
| 22 | <i>nagE</i>                   | K02804        | N-acetylglucosamine PTS system EIICBA or EIICB component [EC:2.7.1.193]           | 2              |
| 23 | <i>agaF</i>                   | K02744        | N-acetylgalactosamine PTS system EIIB component [EC:2.7.1.-]                      | 1              |
| 24 | <i>agaD</i>                   | K10986        | galactosamine PTS system EIIB component                                           | 1              |
| 25 | <i>agaC</i>                   | K10985        | galactosamine PTS system EIIC component                                           | 1              |
| 26 | <i>agaB</i>                   | K10984        | galactosamine PTS system EIIB component [EC:2.7.1.-]                              | 1              |
| 27 | <i>fruB</i>                   | K02768        | fructose PTS system EIIB component [EC:2.7.1.202]                                 | 1              |
| 28 | <i>srlE</i>                   | K02782        | glucitol/sorbitol PTS system EIIB component [EC:2.7.1.198]                        | 1              |
| 29 | <i>srlA</i>                   | K02783        | glucitol/sorbitol PTS system EIIC component                                       | 1              |

Table S14. The predicted biosynthetic gene clusters of secondary metabolites.

| Region | Length   | Total Proteins | Type                       | Region Position       | ClusterBlast                                                             |
|--------|----------|----------------|----------------------------|-----------------------|--------------------------------------------------------------------------|
| 1      | 11.260Kb | 13             | RiPP-like                  | 374,530 - 385,789     | NZ_CP035143 (374689-386840), bacteriocin, 91% of genes show similarity   |
| 2      | 41.170Kb | 38             | T3PKS                      | 1,792,491 - 1,833,660 | NZ_CP028977 (1817876-1859046), T3PKS, 97% of genes show similarity       |
| 3      | 20.882Kb | 21             | terpene                    | 2,844,604 - 2,865,485 | NZ_CP015857 (2748148-2769030), terpene, 94% of genes show similarity     |
| 4      | 20.706Kb | 19             | cyclic-lactone-autoinducer | 3,071,820 - 3,092,525 | NZ_KB946320 (432500-458581), lanthipeptide, 13% of genes show similarity |

Table S15. The RiPP-like region elements of *Lactiplantibacillus plantarum* JS21.

| Gene                      | Start  | Stop   | Strand | Description                                                                                    | E-Value | Percent Identity | Accession      |
|---------------------------|--------|--------|--------|------------------------------------------------------------------------------------------------|---------|------------------|----------------|
| gene0357                  | 375687 | 375858 | +      | hypothetical protein [ <i>Lactiplantibacillus plantarum</i> ]                                  | 4E-29   | 1                | WP_027822766.1 |
| gene0358                  | 375912 | 377088 | -      | IS256 family transposase [ <i>Lactiplantibacillus plantarum</i> ]                              | 0       | 0.9898           | WP_310581100.1 |
| gene0359                  | 377181 | 377922 | -      | CPBP family intramembrane glutamic endopeptidase [ <i>Lactiplantibacillus plantarum</i> ]      | 7E-166  | 0.9917           | WP_027821503.1 |
| gene0360                  | 378020 | 378179 | -      | two-peptide bacteriocin plantaricin EF subunit PlnF [ <i>Lactiplantibacillus plantarum</i> ]   | 5E-29   | 1                | WP_027822764.1 |
| gene0361                  | 378203 | 378374 | -      | two-peptide bacteriocin plantaricin EF subunit PlnE [ <i>Lactiplantibacillus plantarum</i> ]   | 2E-30   | 0.9821           | WP_102115620.1 |
| gene0362 ( <i>blpA</i> )  | 378639 | 379470 | +      | Transport/processing ATP-binding protein ComA [ <i>Lactiplantibacillus plantarum</i> ]         | 0       | 0.9819           | OUS99406.1     |
| gene0363 ( <i>blpA</i> )  | 379529 | 380789 | +      | peptide cleavage/export ABC transporter [ <i>Lactiplantibacillus plantarum</i> ]               | 0       | 0.9976           | WP_234521144.1 |
| gene0364 ( <i>blpB</i> )  | 380805 | 382182 | +      | HlyD family secretion protein [ <i>Lactiplantibacillus plantarum</i> ]                         | 0       | 1                | WP_027821501.1 |
| gene0365                  | 382271 | 382961 | +      | CPBP family intramembrane glutamic endopeptidase [ <i>Lactiplantibacillus plantarum</i> ]      | 3E-163  | 0.9956           | WP_053339246.1 |
| gene0366                  | 383028 | 383697 | +      | CPBP family intramembrane glutamic endopeptidase [ <i>Lactiplantibacillus plantarum</i> ]      | 6E-156  | 1                | WP_027822761.1 |
| gene0367                  | 383783 | 384464 | +      | CPBP family intramembrane glutamic endopeptidase [ <i>Lactiplantibacillus plantarum</i> ]      | 5E-160  | 1                | WP_027822760.1 |
| gene0368                  | 384557 | 385232 | +      | CPBP family intramembrane glutamic endopeptidase [ <i>Lactiplantibacillus plantarum</i> ]      | 7E-158  | 1                | WP_027822759.1 |
| gene0369( <i>higB-I</i> ) | 385379 | 385670 | +      | type II toxin-antitoxin system RelE/ParE family toxin [ <i>Lactiplantibacillus plantarum</i> ] | 3E-65   | 1                | WP_027822758.1 |

Table S16. The T3PKS region elements of *Lactiplantibacillus plantarum* JS21.

| Gene                     | Start   | Stop    | Strand | Description                                                                            | E-Value | Percent Identity | Accession      |
|--------------------------|---------|---------|--------|----------------------------------------------------------------------------------------|---------|------------------|----------------|
| gene1731( <i>polC</i> )  | 1792817 | 1797131 | -      | DNA polymerase III subunit alpha [ <i>Lactiplantibacillus plantarum</i> ]              | 0       | 1                | WP_003640729.1 |
| gene1732( <i>proS</i> )  | 1797624 | 1799334 | -      | proline-tRNA ligase [ <i>Lactiplantibacillus plantarum</i> ]                           | 0       | 0.9982           | WP_185936516.1 |
| gene1733( <i>rseP</i> )  | 1799373 | 1800651 | -      | RIP metalloprotease RseP [ <i>Lactiplantibacillus plantarum</i> ]                      | 0       | 0.9976           | WP_172637917.1 |
| gene1734 ( <i>cdsA</i> ) | 1800688 | 1801474 | -      | phosphatidate cytidyltransferase [ <i>Lactiplantibacillus plantarum</i> ]              | 0       | 0.9962           | WP_251335027.1 |
| gene1735 ( <i>uppS</i> ) | 1801489 | 1802269 | -      | isoprenyl transferase [ <i>Lactiplantibacillus plantarum</i> ]                         | 0       | 0.9961           | WP_045351394.1 |
| gene1736 ( <i>frr</i> )  | 1802388 | 1802952 | -      | ribosome recycling factor [ <i>Lactiplantibacillus plantarum</i> ]                     | 1E-129  | 0.9947           | WP_208664135.1 |
| gene1737 ( <i>pyrH</i> ) | 1802953 | 1803676 | -      | UMP kinase [ <i>Lactiplantibacillus plantarum</i> ]                                    | 1E-173  | 0.9958           | WP_079111798.1 |
| gene1738 ( <i>tsf</i> )  | 1803875 | 1804754 | -      | translation elongation factor Ts [ <i>Lactiplantibacillus plantarum</i> ]              | 0       | 0.9966           | WP_135517078.1 |
| gene1739 ( <i>rpsB</i> ) | 1804856 | 1805660 | -      | 30S ribosomal protein S2 [ <i>Lactiplantibacillus plantarum</i> ]                      | 0       | 0.9963           | WP_259689552.1 |
| gene1740                 | 1805884 | 1806607 | +      | HAD family hydrolase [ <i>Lactiplantibacillus plantarum</i> ]                          | 3E-175  | 0.9958           | WP_160248452.1 |
| gene1741 ( <i>ldhA</i> ) | 1806896 | 1807895 | -      | D-2-hydroxyacid dehydrogenase [ <i>Lactiplantibacillus plantarum</i> ]                 | 0       | 0.997            | WP_142262829.1 |
| gene1742                 | 1807979 | 1808285 | -      | GIY-YIG nuclease family protein [ <i>Lactiplantibacillus plantarum</i> ]               | 1E-66   | 1                | WP_003645628.1 |
| gene1743                 | 1808268 | 1809027 | -      | tRNA1(Val) (adenine(37)-N6)-methyltransferase [ <i>Lactiplantibacillus plantarum</i> ] | 0       | 1                | WP_003645629.1 |

|                              |         |         |   |                                                                                                     |        |        |                |
|------------------------------|---------|---------|---|-----------------------------------------------------------------------------------------------------|--------|--------|----------------|
| gene1744 ( <i>plsC</i> )     | 1809138 | 1809774 | + | 1-acylglycerol-3-phosphate O-acyltransferase [ <i>Lactiplantibacillus plantarum</i> ST-III]         | 2E-153 | 1      | ADN98865.1     |
| gene1745                     | 1809830 | 1810061 | - | hypothetical protein LPST_C1650 [ <i>Lactiplantibacillus plantarum</i> ST-III]                      | 3E-48  | 1      | ADN98866.1     |
| gene1746                     | 1810164 | 1810437 | - | hypothetical protein Lp16_1605 [ <i>Lactiplantibacillus plantarum</i> 16]                           | 4E-56  | 1      | AGO08290.1     |
| gene1747 ( <i>lexA</i> )     | 1810555 | 1811188 | + | LexA repressor [ <i>Lactiplantibacillus plantarum</i> ]                                             | 1E-152 | 0.9952 | MCG0732895.1   |
| gene1748                     | 1811811 | 1812441 | + | hypothetical protein [ <i>Lactiplantibacillus plantarum</i> ]                                       | 2E-142 | 0.9904 | WP_015825658.1 |
| gene1749                     | 1812490 | 1813660 | - | hydroxymethylglutaryl-CoA synthase [ <i>Lactiplantibacillus plantarum</i> ]                         | 0      | 1      | WP_015380455.1 |
| gene1750                     | 1813695 | 1814088 | - | hypothetical protein [ <i>Lactiplantibacillus plantarum</i> ]                                       | 3E-92  | 1      | KZT97394.1     |
| gene1751                     | 1814251 | 1814644 | + | hypothetical protein [ <i>Lactiplantibacillus plantarum</i> ]                                       | 5E-88  | 0.9923 | WP_015380457.1 |
| gene1752                     | 1815089 | 1816031 | + | glycosyltransferase family 2 protein [ <i>Lactiplantibacillus plantarum</i> ]                       | 0      | 0.9968 | MDN6215184.1   |
| gene1753                     | 1816730 | 1817303 | - | helix-turn-helix domain containing protein [ <i>Lactiplantibacillus plantarum</i> ]                 | 1E-135 | 0.9947 | WP_031275254.1 |
| gene1754 ( <i>tagT_U_V</i> ) | 1817454 | 1818543 | - | LCP family protein [ <i>Lactiplantibacillus plantarum</i> ]                                         | 0      | 1      | MBS0953805.1   |
| gene1755                     | 1818581 | 1819013 | - | putative transposase for insertion sequence element IS6501 [ <i>Lactiplantibacillus plantarum</i> ] | 2E-102 | 1      | OUT01805.1     |
| gene1756                     | 1818985 | 1819357 | - | Transposase [ <i>Lactiplantibacillus plantarum</i> ZJ316]                                           | 6E-85  | 1      | AGE37926.1     |
| gene1757                     | 1819474 | 1820266 | - | ABC transporter ATP-binding protein [ <i>Lactiplantibacillus plantarum</i> ]                        | 0      | 0.9962 | WP_260187879.1 |
| gene1758                     | 1820284 | 1822027 | - | ABC transporter permease subunit [ <i>Lactiplantibacillus plantarum</i> ]                           | 0      | 1      | WP_016527118.1 |
| gene1759 ( <i>rodA</i> )     | 1822505 | 1823717 | - | FtsW/RodA/SpoVE family cell cycle protein [ <i>Lactiplantibacillus plantarum</i> ]                  | 0      | 1      | WP_003645640.1 |
| gene1761                     | 1824503 | 1824878 | - | phage holin [ <i>Lactiplantibacillus plantarum</i> ]                                                | 8E-78  | 0.9839 | WP_285298920.1 |
| gene1762                     | 1824890 | 1825154 | - | hypothetical protein [ <i>Lactiplantibacillus plantarum</i> ]                                       | 2E-53  | 1      | MCG0627622.1   |
| gene1763                     | 1825153 | 1826179 | - | GH25 family lysozyme [ <i>Lactiplantibacillus plantarum</i> ]                                       | 0      | 0.9528 | WP_172639632.1 |
| gene1764                     | 1826190 | 1826436 | - | hypothetical protein [ <i>Lactiplantibacillus paraplantarum</i> ]                                   | 2E-44  | 0.9136 | WP_056988443.1 |
| gene1765                     | 1826432 | 1827797 | - | collagen-like protein [ <i>Lactiplantibacillus plantarum</i> ]                                      | 0      | 0.7362 | WP_301667370.1 |
| gene1766                     | 1827780 | 1827942 | - | hypothetical protein [ <i>Lactiplantibacillus plantarum</i> ]                                       | 8E-27  | 0.9811 | WP_165836136.1 |
| gene1767                     | 1827945 | 1828188 | - | hypothetical protein [ <i>Lactiplantibacillus plantarum</i> ]                                       | 3E-47  | 0.9875 | WP_163627199.1 |
| gene1768 ( <i>sadA</i> )     | 1828180 | 1830976 | - | phage tail protein [ <i>Lactiplantibacillus plantarum</i> ]                                         | 0      | 0.7575 | WP_262339558.1 |
| gene1769                     | 1830992 | 1833407 | - | phage tail spike protein [ <i>Lactiplantibacillus plantarum</i> ]                                   | 0      | 0.9478 | WP_163627195.1 |

Table S17. The terpene region elements of *Lactiplantibacillus plantarum* JS21.

| Gene                    | Start   | Stop    | Strand | Description                                                                           | E-Value | Percent Identity | Accession      |
|-------------------------|---------|---------|--------|---------------------------------------------------------------------------------------|---------|------------------|----------------|
| gene2784                | 2845125 | 2845353 | -      | PLDc N-terminal domain-containing protein [ <i>Lactiplantibacillus plantarum</i> ]    | 2E-46   | 0.9867           | WP_074161759.1 |
| gene2785                | 2845413 | 2846097 | -      | metallophosphoesterase [ <i>Lactiplantibacillus plantarum</i> ]                       | 2E-167  | 1                | WP_225914106.1 |
| gene2786( <i>cpdA</i> ) | 2846093 | 2846261 | -      | hypothetical protein [ <i>Lactiplantibacillus plantarum</i> ]                         | 2E-31   | 1                | WP_225914107.1 |
| gene2787                | 2846702 | 2847254 | +      | Acetyltransferase [ <i>Lactiplantibacillus plantarum</i> subsp. <i>plantarum</i> P-8] | 6E-133  | 0.9945           | AGL65399.2     |
| gene2788                | 2847525 | 2848524 | -      | IS30 family transposase [ <i>Lactiplantibacillus plantarum</i> ]                      | 0       | 0.997            | WP_247965010.1 |
| gene2789( <i>lrgA</i> ) | 2848781 | 2849201 | -      | CidA/LrgA family protein [ <i>Lactiplantibacillus plantarum</i> ]                     | 7E-90   | 0.9928           | WP_063852339.1 |
| gene2790( <i>lrgB</i> ) | 2849220 | 2849718 | -      | LrgB family protein [ <i>Lactiplantibacillus plantarum</i> ]                          | 3E-107  | 0.9939           | MCG5037381.1   |
| gene2791( <i>lrgB</i> ) | 2849748 | 2849949 | -      | LrgB family protein [ <i>Lactiplantibacillus plantarum</i> ]                          | 5E-37   | 1                | WP_134795272.1 |
| gene2792                | 2850123 | 2850999 | -      | DegV family protein [ <i>Lactiplantibacillus plantarum</i> ZJ316]                     | 0       | 1                | AGE40626.1     |
| gene2793                | 2851487 | 2851655 | -      | hypothetical protein [ <i>Lactiplantibacillus plantarum</i> ]                         | 2E-31   | 1                | WP_021357416.1 |



|          |         |         |   |                                                                                    |        |        |                |
|----------|---------|---------|---|------------------------------------------------------------------------------------|--------|--------|----------------|
| gene2794 | 2851822 | 2852521 | + | zinc metalloproteinase [ <i>Lactiplantibacillus plantarum</i> ]                    | 3E-165 | 0.9957 | WP_057717055.1 |
| gene2795 | 2853126 | 2854623 | + | phytoene desaturase family protein [ <i>Lactiplantibacillus plantarum</i> ]        | 0      | 1      | WP_011102097.1 |
| gene2796 | 2854603 | 2855485 | + | phytoene/squalene synthase family protein [ <i>Lactiplantibacillus plantarum</i> ] | 0      | 1      | WP_027822316.1 |
| gene2797 | 2855846 | 2856788 | + | alpha/beta hydrolase [ <i>Lactiplantibacillus plantarum</i> ]                      | 0      | 0.9968 | WP_168177697.1 |
| gene2798 | 2856854 | 2857967 | - | glycerate kinase [ <i>Lactiplantibacillus plantarum</i> ]                          | 0      | 1      | WP_054519129.1 |
| gene2799 | 2858102 | 2859437 | + | NAD(P)/FAD-dependent oxidoreductase [ <i>Lactiplantibacillus plantarum</i> ]       | 0      | 1      | WP_027822314.1 |
| gene2800 | 2859631 | 2859961 | + | bacteriocin immunity protein [ <i>Lactiplantibacillus plantarum</i> ]              | 1E-72  | 1      | WP_021357419.1 |
| gene2801 | 2860183 | 2861482 | - | adenylosuccinate lyase [ <i>Lactiplantibacillus plantarum</i> ]                    | 0      | 1      | WP_003645480.1 |
| gene2802 | 2861798 | 2863088 | + | adenylosuccinate synthase [ <i>Lactiplantibacillus plantarum</i> ]                 | 0      | 1      | WP_015381012.1 |
| gene2803 | 2863130 | 2864108 | + | GMP reductase [ <i>Lactiplantibacillus plantarum</i> ZJ316]                        | 0      | 1      | AGE40638.1     |
| gene2804 | 2864200 | 2865142 | - | ABC transporter ATP-binding protein [ <i>Lactiplantibacillus plantarum</i> ]       | 0      | 0.9968 | AYG28017.1     |

Table S18. The cyclic-lactone-autoinducer region elements of *Lactiplantibacillus plantarum* JS21.

| Gene                        | Start   | Stop    | Strand | Description                                                                                                   | E-Value | Percent Identity | Accession      |
|-----------------------------|---------|---------|--------|---------------------------------------------------------------------------------------------------------------|---------|------------------|----------------|
| gene3001                    | 3072566 | 3073772 | -      | FAD-dependent oxidoreductase [ <i>Lactiplantibacillus plantarum</i> ]                                         | 0       | 0.9975           | WP_301699601.1 |
| gene3002                    | 3074238 | 3074610 | +      | TIGR02328 family protein [ <i>Lactiplantibacillus plantarum</i> ]                                             | 6E-87   | 0.9919           | WP_172637956.1 |
| gene3003                    | 3074805 | 3075354 | -      | folate family ECF transporter S component [ <i>Lactiplantibacillus plantarum</i> ]                            | 6E-124  | 0.9945           | WP_196241767.1 |
| gene3004                    | 3075483 | 3076482 | +      | IS30 family transposase [ <i>Lactiplantibacillus plantarum</i> ]                                              | 0       | 0.997            | WP_247965010.1 |
| gene3005                    | 3076664 | 3076799 | -      | hypothetical protein [ <i>Lactiplantibacillus plantarum</i> ]                                                 | 2E-20   | 1                | WP_003642924.1 |
| gene3006                    | 3076815 | 3077061 | -      | GlsB/YeaQ/YmgE family stress response membrane protein [ <i>Lactiplantibacillus plantarum</i> ]               | 2E-44   | 1                | WP_070085348.1 |
| gene3007<br>( <i>katE</i> ) | 3077406 | 3078861 | +      | catalase [ <i>Lactiplantibacillus plantarum</i> subsp. <i>plantarum</i> ATCC 14917 = JCM 1149 = CGMCC 1.2437] | 0       | 0.9979           | EFK28610.1     |
| gene3008<br>( <i>spxA</i> ) | 3079018 | 3079456 | -      | Spx/MgsR family RNA polymerase-binding regulatory protein [ <i>Lactiplantibacillus plantarum</i> ]            | 2E-101  | 0.9931           | WP_103420511.1 |
| gene3009<br>( <i>agrA</i> ) | 3079811 | 3080555 | -      | LytTR family DNA-binding domain-containing protein [ <i>Lactiplantibacillus plantarum</i> ]                   | 0       | 0.9919           | WP_168786167.1 |
| gene3010                    | 3080547 | 3081810 | -      | GHKL domain-containing protein [ <i>Lactiplantibacillus plantarum</i> ]                                       | 0       | 1                | WP_054519202.1 |
| gene3011                    | 3081819 | 3081948 | -      | cyclic lactone autoinducer peptide [ <i>Lactiplantibacillus</i> ]                                             | 1E-21   | 1                | WP_003643585.1 |
| gene3012                    | 3081928 | 3082525 | -      | accessory gene regulator AgrB [ <i>Lactiplantibacillus plantarum</i> ]                                        | 1E-134  | 0.9949           | WP_241467921.1 |
| gene3013<br>( <i>clpL</i> ) | 3082892 | 3085007 | -      | ATP-dependent Clp protease ATP-binding subunit [ <i>Lactiplantibacillus plantarum</i> ]                       | 0       | 0.9972           | WP_057137373.1 |
| gene3014                    | 3085397 | 3085631 | -      | hypothetical protein [ <i>Lactiplantibacillus plantarum</i> ]                                                 | 6E-50   | 0.987            | WP_169484439.1 |
| gene3015<br>( <i>lctO</i> ) | 3086259 | 3087360 | -      | lactate oxidase [ <i>Lactiplantibacillus plantarum</i> ]                                                      | 0       | 1                | WP_102115675.1 |
| gene3016                    | 3087386 | 3089135 | -      | thiamine pyrophosphate-binding protein [ <i>Lactiplantibacillus plantarum</i> ]                               | 0       | 0.9966           | WP_108910153.1 |
| gene3017                    | 3089222 | 3089648 | -      | Rrf2 family transcriptional regulator [ <i>Lactiplantibacillus plantarum</i> ]                                | 5E-99   | 0.9929           | WP_123808678.1 |
| gene3018<br>( <i>poxL</i> ) | 3089820 | 3091632 | -      | pyruvate oxidase [ <i>Lactiplantibacillus plantarum</i> ]                                                     | 0       | 1                | WP_003646223.1 |

---

|                 |         |         |   |                                                     |                              |       |   |            |
|-----------------|---------|---------|---|-----------------------------------------------------|------------------------------|-------|---|------------|
| gene3019        | 3092002 | 3092380 | - | glucitol/sorbitol-specific PTS system IIA component | [ <i>Lactiplantibacillus</i> | 1E-84 | 1 | BEI65651.1 |
| ( <i>srlB</i> ) |         |         |   | <i>plantarum</i> ]                                  |                              |       |   |            |

---

Table S19. Putative probiotic genes are found in the genome of *Lactiplantibacillus plantarum* JS21.

| Gene ID                                          | Gene Name   | Strand | Start   | End     | KO ID  | KO Description                                                                                                               |
|--------------------------------------------------|-------------|--------|---------|---------|--------|------------------------------------------------------------------------------------------------------------------------------|
| Stress resistance genes                          |             |        |         |         |        |                                                                                                                              |
| gene2094                                         | <i>atpC</i> | -      | 2128509 | 2128081 | K02114 | F-type H <sup>+</sup> -transporting ATPase subunit epsilon                                                                   |
| gene2095                                         | <i>atpD</i> | -      | 2129924 | 2128521 | K02112 | F-type H <sup>+</sup> /Na <sup>+</sup> -transporting ATPase subunit beta [EC:7.1.2.2 7.2.2.1]                                |
| gene2096                                         | <i>atpG</i> | -      | 2130893 | 2129949 | K02115 | F-type H <sup>+</sup> -transporting ATPase subunit gamma                                                                     |
| gene2097                                         | <i>atpA</i> | -      | 2132443 | 2130923 | K02111 | F-type H <sup>+</sup> /Na <sup>+</sup> -transporting ATPase subunit alpha [EC:7.1.2.2 7.2.2.1]                               |
| gene2098                                         | <i>atpH</i> | -      | 2133011 | 2132466 | K02113 | F-type H <sup>+</sup> -transporting ATPase subunit delta                                                                     |
| gene2099                                         | <i>atpF</i> | -      | 2133516 | 2133001 | K02109 | F-type H <sup>+</sup> -transporting ATPase subunit b                                                                         |
| gene2100                                         | <i>atpE</i> | -      | 2133782 | 2133570 | K02110 | F-type H <sup>+</sup> -transporting ATPase subunit c                                                                         |
| gene2101                                         | <i>atpB</i> | -      | 2134533 | 2133820 | K02108 | F-type H <sup>+</sup> -transporting ATPase subunit a                                                                         |
| gene1587                                         | <i>uup</i>  | -      | 1641766 | 1639868 | K15738 | ABC transport system ATP-binding/permease protein                                                                            |
| gene0566                                         | -           | -      | 591900  | 589918  | K06158 | ATP-binding cassette, subfamily F, member 3                                                                                  |
| gene0354                                         | -           | +      | 372316  | 373500  | -      | cation: proton antiporter                                                                                                    |
| gene0651                                         | <i>nhaK</i> | +      | 695509  | 697638  | K24163 | monovalent cation/hydrogen antiporter                                                                                        |
| gene0728                                         | -           | -      | 775397  | 773541  | K03455 | monovalent cation: H <sup>+</sup> antiporter-2, CPA2 family                                                                  |
| gene2241                                         | <i>nhaK</i> | +      | 2270261 | 2272264 | K24163 | monovalent cation/hydrogen antiporter                                                                                        |
| gene2293                                         | <i>nhaK</i> | -      | 2321931 | 2320339 | K24163 | monovalent cation/hydrogen antiporter                                                                                        |
| gene2426                                         | -           | -      | 2468631 | 2467465 | -      | cation: proton antiporter                                                                                                    |
| gene2691                                         | <i>nhaK</i> | -      | 2747753 | 2746152 | K24163 | monovalent cation/hydrogen antiporter                                                                                        |
| gene2862                                         | <i>nhaC</i> | -      | 2927387 | 2925963 | K03315 | Na <sup>+</sup> :H <sup>+</sup> antiporter, NhaC family                                                                      |
| gene0123                                         | -           | -      | 130332  | 127594  | -      | MULTISPECIES: cation-transporting P-type ATPase                                                                              |
| gene0945                                         | <i>ctpE</i> | +      | 1011030 | 1013369 | K12952 | cation-transporting P-type ATPase E [EC:7.2.2.-]                                                                             |
| gene1627                                         | -           | -      | 1689159 | 1686883 | K01535 | H <sup>+</sup> -transporting ATPase [EC:7.1.2.1]                                                                             |
| gene2632                                         | <i>copA</i> | -      | 2677369 | 2675444 | K17686 | P-type Cu <sup>+</sup> transporter [EC:7.2.2.8]                                                                              |
| gene2855                                         | -           | +      | 2917466 | 2919310 | -      | MULTISPECIES: heavy metal translocating P-type ATPase                                                                        |
| pWS05b0022                                       | -           | +      | 22708   | 25482   | -      | HAD-IC family P-type ATPase                                                                                                  |
| DNA and protein protection and repair            |             |        |         |         |        |                                                                                                                              |
| gene0618                                         | <i>clpP</i> | -      | 650100  | 649510  | K01358 | ATP-dependent Clp protease, protease subunit [EC:3.4.21.92]                                                                  |
| gene0840                                         | <i>clpC</i> | +      | 897938  | 900442  | K03696 | ATP-dependent Clp protease ATP-binding subunit ClpC                                                                          |
| gene1000                                         | <i>clpE</i> | -      | 1066996 | 1064930 | K03697 | ATP-dependent Clp protease ATP-binding subunit ClpE                                                                          |
| gene1125                                         | <i>clpP</i> | +      | 1178947 | 1179666 | K01358 | ATP-dependent Clp protease, protease subunit [EC:3.4.21.92]                                                                  |
| gene1613                                         | <i>clpB</i> | -      | 1671411 | 1668808 | K03695 | ATP-dependent Clp protease ATP-binding subunit ClpB                                                                          |
| gene1780                                         | <i>clpP</i> | -      | 1845110 | 1844346 | K01358 | ATP-dependent Clp protease, protease subunit [EC:3.4.21.92]                                                                  |
| gene1865                                         | <i>clpX</i> | -      | 1903396 | 1902131 | K03544 | ATP-dependent Clp protease ATP-binding subunit ClpX                                                                          |
| gene3013                                         | <i>clpL</i> | -      | 3085007 | 3082893 | K04086 | ATP-dependent Clp protease ATP-binding subunit ClpL                                                                          |
| Exopolysaccharide biosynthesis responsible genes |             |        |         |         |        |                                                                                                                              |
| gene0228                                         | <i>cysE</i> | -      | 244105  | 243563  | K00640 | serine O-acetyltransferase [EC:2.3.1.30]                                                                                     |
| gene0406                                         | <i>glmU</i> | +      | 421185  | 422567  | K04042 | bifunctional UDP-N-acetylglucosamine pyrophosphorylase / glucosamine-1-phosphate N-acetyltransferase [EC:2.7.7.23 2.3.1.157] |

|                                                     |             |   |         |         |        |                                                                                                              |
|-----------------------------------------------------|-------------|---|---------|---------|--------|--------------------------------------------------------------------------------------------------------------|
| gene0450                                            | -           | + | 476535  | 478139  | K03328 | polysaccharide transporter, PST family                                                                       |
| gene0555                                            | <i>galE</i> | + | 579356  | 580351  | K01784 | UDP-glucose 4-epimerase [EC:5.1.3.2]                                                                         |
| gene0572                                            | <i>wecA</i> | + | 598014  | 599111  | K02851 | UDP-GlcNAc:undecaprenyl-phosphate/decaprenyl-phosphate GlcNAc-1-phosphate transferase [EC:2.7.8.33 2.7.8.35] |
| gene0594                                            | <i>galU</i> | + | 620532  | 621452  | K00963 | UTP--glucose-1-phosphate uridylyltransferase [EC:2.7.7.9]                                                    |
| gene0677                                            | <i>licD</i> | - | 725651  | 724842  | K07271 | lipopolysaccharide cholinephosphotransferase [EC:2.7.8.-]                                                    |
| gene0963                                            | <i>wecB</i> | + | 1029283 | 1030401 | K01791 | UDP-N-acetylglucosamine 2-epimerase (non-hydrolysing) [EC:5.1.3.14]                                          |
| gene1049                                            | -           | + | 1122380 | 1124050 | -      | polysaccharide biosynthesis protein                                                                          |
| gene1287                                            | <i>pgaC</i> | - | 1342525 | 1341212 | K11936 | poly-beta-1,6-N-acetyl-D-glucosamine synthase [EC:2.4.1.-]                                                   |
| gene1440                                            | -           | + | 1491247 | 1491852 | K21713 | lytic chitin monooxygenase [EC:1.14.99.53]                                                                   |
| gene1843                                            | -           | - | 1885579 | 1884575 | -      | polysaccharide biosynthesis C-terminal domain-containing protein                                             |
| gene1852                                            | <i>galE</i> | - | 1892059 | 1891118 | K01784 | UDP-glucose 4-epimerase [EC:5.1.3.2]                                                                         |
| gene1855                                            | <i>epsA</i> | - | 1893757 | 1893560 | K19420 | protein tyrosine kinase modulator                                                                            |
| gene1856                                            | <i>epsA</i> | - | 1894320 | 1893760 | K19420 | protein tyrosine kinase modulator                                                                            |
| gene1887                                            | <i>pgaC</i> | - | 1927958 | 1926606 | K11936 | poly-beta-1,6-N-acetyl-D-glucosamine synthase [EC:2.4.1.-]                                                   |
| gene2111                                            | <i>manA</i> | - | 2146653 | 2145688 | K01809 | mannose-6-phosphate isomerase [EC:5.3.1.8]                                                                   |
| gene2327                                            | <i>pgaC</i> | + | 2362543 | 2363871 | K11936 | poly-beta-1,6-N-acetyl-D-glucosamine synthase [EC:2.4.1.-]                                                   |
| gene2969                                            | <i>galE</i> | - | 3037290 | 3036286 | K01784 | UDP-glucose 4-epimerase [EC:5.1.3.2]                                                                         |
| pWS03b0015                                          | <i>epsA</i> | + | 12532   | 13299   | K19420 | protein tyrosine kinase modulator                                                                            |
| pWS03b0055                                          | <i>epsA</i> | + | 54095   | 54199   | K19420 | protein tyrosine kinase modulator                                                                            |
| gene1854                                            | <i>epsB</i> | - | 1893542 | 1892835 | K00903 | protein-tyrosine kinase [EC:2.7.10.3]                                                                        |
| pWS03b0016                                          | <i>epsB</i> | + | 13310   | 14038   | K00903 | protein-tyrosine kinase [EC:2.7.10.3]                                                                        |
| Lipoteichoic acid (LTA) synthesis responsible genes |             |   |         |         |        |                                                                                                              |
| gene1706                                            | <i>dltD</i> | - | 1767288 | 1766011 | K03740 | D-alanine transfer protein                                                                                   |
| gene1708                                            | <i>dltB</i> | - | 1768765 | 1767551 | K03739 | membrane protein involved in D-alanine export                                                                |
| Adhesion ability                                    |             |   |         |         |        |                                                                                                              |
| gene1524                                            | -           | - | 1574724 | 1573018 | -      | fibronectin-binding domain-containing protein                                                                |
| gene0427                                            | <i>srtA</i> | + | 445842  | 446546  | K07284 | sortase A [EC:3.4.22.70]                                                                                     |
| Anti-pathogenic effect                              |             |   |         |         |        |                                                                                                              |
| gene0609                                            | <i>luxS</i> | + | 638874  | 639350  | K07173 | S-ribosylhomocysteine lyase [EC:4.4.1.21]                                                                    |
| Biofilm formation                                   |             |   |         |         |        |                                                                                                              |
| gene0018                                            | <i>glgC</i> | + | 23093   | 24232   | K00975 | glucose-1-phosphate adenyltransferase [EC:2.7.7.27]                                                          |
| gene0019                                            | <i>glgC</i> | + | 24229   | 25401   | K00975 | glucose-1-phosphate adenyltransferase [EC:2.7.7.27]                                                          |
| gene0020                                            | <i>glgA</i> | + | 25394   | 26833   | K00703 | starch synthase [EC:2.4.1.21]                                                                                |
| gene0021                                            | <i>glgP</i> | + | 26853   | 29249   | K00688 | glycogen phosphorylase [EC:2.4.1.1]                                                                          |
| gene0228                                            | <i>cysE</i> | - | 244105  | 243563  | K00640 | serine O-acetyltransferase [EC:2.3.1.30]                                                                     |
| gene0609                                            | <i>luxS</i> | + | 638874  | 639350  | K07173 | S-ribosylhomocysteine lyase [EC:4.4.1.21]                                                                    |
| gene0620                                            | <i>rpoN</i> | + | 651074  | 652411  | K03092 | RNA polymerase sigma-54 factor                                                                               |
| gene0711                                            | <i>crr</i>  | + | 758720  | 759211  | K02777 | sugar PTS system EIIA component [EC:2.7.1.-]                                                                 |
| gene0963                                            | <i>wecB</i> | + | 1029283 | 1030401 | K01791 | UDP-N-acetylglucosamine 2-epimerase (non-hydrolysing) [EC:5.1.3.14]                                          |
| gene1287                                            | <i>pgaC</i> | - | 1342525 | 1341212 | K11936 | poly-beta-1,6-N-acetyl-D-glucosamine synthase [EC:2.4.1.-]                                                   |
| gene1398                                            | <i>trpE</i> | + | 1453129 | 1454565 | K01657 | anthranilate synthase component I [EC:4.1.3.27]                                                              |
| gene1399                                            | <i>trpG</i> | + | 1454516 | 1455124 | K01658 | anthranilate synthase component II [EC:4.1.3.27]                                                             |

|            |             |   |         |         |        |                                                            |
|------------|-------------|---|---------|---------|--------|------------------------------------------------------------|
| gene1887   | <i>pgaC</i> | - | 1927958 | 1926606 | K11936 | poly-beta-1,6-N-acetyl-D-glucosamine synthase [EC:2.4.1.-] |
| gene2327   | <i>pgaC</i> | + | 2362543 | 2363871 | K11936 | poly-beta-1,6-N-acetyl-D-glucosamine synthase [EC:2.4.1.-] |
| gene2575   | <i>crr</i>  | - | 2625805 | 2625359 | K02777 | sugar PTS system EIIA component [EC:2.7.1.-]               |
| gene2786   | <i>cpdA</i> | - | 2846261 | 2846094 | K03651 | 3',5'-cyclic-AMP phosphodiesterase [EC:3.1.4.53]           |
| pWS05 0001 | <i>glgC</i> | + | 3       | 392     | K00975 | glucose-1-phosphate adenyltransferase [EC:2.7.7.27]        |
| pWS05 0002 | <i>glgA</i> | + | 389     | 1831    | K00703 | starch synthase [EC:2.4.1.21]                              |
| pWS05 0003 | <i>glgP</i> | + | 1838    | 4252    | K00688 | glycogen phosphorylase [EC:2.4.1.1]                        |
| pWS05 0035 | <i>glgC</i> | + | 38120   | 39268   | K00975 | glucose-1-phosphate adenyltransferase [EC:2.7.7.27]        |
| pWS05 0036 | <i>glgC</i> | + | 39255   | 40424   | K00975 | glucose-1-phosphate adenyltransferase [EC:2.7.7.27]        |
| pWS05 0037 | <i>glgA</i> | + | 40421   | 41863   | K00703 | starch synthase [EC:2.4.1.21]                              |
| pWS05 0038 | <i>glgP</i> | + | 41870   | 44284   | K00688 | glycogen phosphorylase [EC:2.4.1.1]                        |

Table S20. The hydrophobicity, auto-aggregation, and co-aggregation of *Lactiplantibacillus plantarum* JS21

| hydrophobicity | auto-aggregation | Co-aggregation              |                      |                               |                                      |
|----------------|------------------|-----------------------------|----------------------|-------------------------------|--------------------------------------|
|                |                  | <i>E. coli</i> (ATCC 25922) | <i>E. coli</i> (K88) | <i>S. aureus</i> (CMCC 26003) | <i>L. monocytogenes</i> (CICC 21635) |
| 60.04±0.96%    | 42.63±1.06%      | 31.69±0.51%                 | 30.97±0.83%          | 44.92±0.30%                   | 35.35±0.70%                          |

Table S21. Tolerance of JS21 to simulated gastrointestinal fluids

| Simulated gastric fluid(pH=2.0)    |                      |                      | Simulated gastric fluid(pH3.0)     |                      |                      |
|------------------------------------|----------------------|----------------------|------------------------------------|----------------------|----------------------|
| Simulated Intestinal Fluid(pH=6.8) |                      |                      | Simulated Intestinal Fluid(pH=6.8) |                      |                      |
| 3h Survival rate (%)               | 3h Survival rate (%) | 6h Survival rate (%) | 3h Survival rate (%)               | 3h Survival rate (%) | 6h Survival rate (%) |
| 18.91%                             | 173.72%              | 244.06%              | 143.75%                            | 182.19%              | 205.48%              |

Table S22. JS21 Inhibition zone results of CFS against pathogens bacteria

| Test Strain                   | Strain Code | Zone of Inhibition (±SD) (mm) |    |            |            |
|-------------------------------|-------------|-------------------------------|----|------------|------------|
|                               |             | CFS                           | NC | Ampicillin | Kanamycin  |
| <i>Escherichia coli</i>       | ATCC 25922  | 16.35±0.04                    | 0  | 11.17±0.07 | 19.85±0.04 |
| <i>Escherichia coli</i>       | K88         | 13.53±0.15                    | 0  | 12.82±0.05 | 16.46±0.10 |
| <i>Staphylococcus aureus</i>  | CMCC 26003  | 16.78±0.11                    | 0  | 31.72±0.14 | 17.43±0.03 |
| <i>Listeria monocytogenes</i> | CICC 21635  | 14.80±0.08                    | 0  | 10.8±0.04  | 18.51±0.04 |
